# Supplementary material
Source: PubMed Central journal article supplement (PMC7207031)
Supplement: supp_8.2.E328_2019-0063-2-at.pdf [file supp_8.2.E328_2019-0063-2-at.pdf]

**Appendix 2 (as supplied by the authors): Supplemental tables**

**Supplemental Table S1. Demographic characteristics of survey respondents compared to Ontario's general population**

**Supplemental Table S2. Association between respondent demographics and self-report of favourable access to primary care as measured by four questions on the provincial Health Care Experience Survey**

**Supplemental Table S3. Full parameter estimates for regression models**

**Supplemental Table S1. Demographic characteristics of survey respondents and the general Ontario population**

|                                       |               | Ontario population not included as Health Care Experience Survey respondents in administrative database (N= 11,176,006) | Ontario population who responded to the Health Care Experience Survey and agreed to link responses to health administrative databases (N= 35,817) |
|---------------------------------------|---------------|-------------------------------------------------------------------------------------------------------------------------|---------------------------------------------------------------------------------------------------------------------------------------------------|
| Number of Aggregated Diagnosis Groups | 0             | 1,121,834 (10.0%)                                                                                                       | 1,894 (5.3%)                                                                                                                                      |
|                                       | 1-5           | 5,008,919 (44.8%)                                                                                                       | 15,666 (43.7%)                                                                                                                                    |
|                                       | 6-9           | 4,068,929 (36.4%)                                                                                                       | 14,681 (41.0%)                                                                                                                                    |
|                                       | 10+           | 976,324 (8.7%)                                                                                                          | 3,576 (10.0%)                                                                                                                                     |
| Resource Utilization Band             | 0 (low)       | 1,119,243 (10.0%)                                                                                                       | 1,877 (5.2%)                                                                                                                                      |
|                                       | 1             | 638,446 (5.7%)                                                                                                          | 1,676 (4.7%)                                                                                                                                      |
|                                       | 2             | 1,995,647 (17.9%)                                                                                                       | 5,780 (16.1%)                                                                                                                                     |
|                                       | 3             | 5,426,480 (48.6%)                                                                                                       | 18,879 (52.7%)                                                                                                                                    |
|                                       | 4             | 1,475,595 (13.2%)                                                                                                       | 5,603 (15.6%)                                                                                                                                     |
|                                       | 5 (high)      | 520,595 (4.7%)                                                                                                          | 2,002 (5.6%)                                                                                                                                      |
| Age                                   | Mean (95% CI) | 46.8 (46.8, 46.9)                                                                                                       | 51.7 (51.5, 51.9)                                                                                                                                 |
|                                       | Median (IQR)  | 46 (31-60)                                                                                                              | 52 (39-64)                                                                                                                                        |
| Neighbourhood income quintile         | 1 (low)       | 2,092,185 (18.8%)                                                                                                       | 5,965 (16.7%)                                                                                                                                     |
|                                       | 2             | 2,181,639 (19.6%)                                                                                                       | 6,709 (18.8%)                                                                                                                                     |
|                                       | 3             | 2,230,393 (20.0%)                                                                                                       | 7,183 (20.1%)                                                                                                                                     |
|                                       | 4             | 2,361,618 (21.2%)                                                                                                       | 7,795 (21.9%)                                                                                                                                     |
|                                       | 5 (high)      | 2,264,753 (20.3%)                                                                                                       | 8,020 (22.5%)                                                                                                                                     |
| Recent registrant                     | No            | 10,053,475 (90.0%)                                                                                                      | 33,686 (94.1%)                                                                                                                                    |
|                                       | Yes           | 1,122,531 (10.0%)                                                                                                       | 2,131 (5.9%)                                                                                                                                      |
| Rurality                              | Urban         | 8,113,967 (73.2%)                                                                                                       | 21,109 (60.0%)                                                                                                                                    |
|                                       | Small town    | 2,146,585 (19.4%)                                                                                                       | 9,657 (27.5%)                                                                                                                                     |
|                                       | Rural         | 826,506 (7.5%)                                                                                                          | 4,404 (12.5%)                                                                                                                                     |
| Sex from RPDB                         | F             | 5,754,601 (51.5%)                                                                                                       | 20,473 (57.2%)                                                                                                                                    |
|                                       | M             | 5,421,405 (48.5%)                                                                                                       | 15,344 (42.8%)                                                                                                                                    |

\*Ontario population includes all Ontario residents with a valid the Ontario Health Insurance Plan, who were alive at the index date, had contacts with the healthcare system in the last 7 to 9 years, and were 16 and older. Patients attending Community Health Centres were excluded.

**Supplemental Table S2. Association between respondent demographics and self-report of favourable access to primary care as measured by four questions on the provincial Health Care Experience Survey**

|                                    | Same/next day access when sick<br>(N=16,602) | Satisfaction with time to visit when sick<br>(N=2,364) | Telephone Access<br>(N=18,179) | Awareness of after-hours clinic<br>(N=33,660) |
|------------------------------------|----------------------------------------------|--------------------------------------------------------|--------------------------------|-----------------------------------------------|
|                                    | N (%)                                        | N (%)                                                  | N (%)                          | N (%)                                         |
| <b>All respondents</b>             | 6684 (40.3%)                                 | 1652 (69.9%)                                           | 14223 (78.2%)                  | 13858 (41.2%)                                 |
| <b>Sex</b>                         |                                              |                                                        |                                |                                               |
| Female                             | 4,135 (40.3%)                                | 980 (68.6%)                                            | 9,021 (78.0%)                  | 8,731 (44.7%)                                 |
| Male                               | 2,549 (40.2%)                                | 672 (71.8%)                                            | 5,202 (78.7%)                  | 5,127 (36.3%)                                 |
| <b>Age</b>                         |                                              |                                                        |                                |                                               |
| 16-49                              | 2,867 (39.5%)                                | 615 (65.6%)                                            | 5,924 (76.5%)                  | 5,644 (39.5%)                                 |
| 50-64                              | 2,068 (38.4%)                                | 533 (68.2%)                                            | 4,596 (77.4%)                  | 4,500 (43.2%)                                 |
| 65-79                              | 1,426 (43.7%)                                | 414 (77.5%)                                            | 3,072 (83.1%)                  | 3,028 (42.5%)                                 |
| 80+                                | 323 (46.9%)                                  | 90 (80.4%)                                             | 631 (78.7%)                    | 686 (37.4%)                                   |
| <b>Rurality</b>                    |                                              |                                                        |                                |                                               |
| Big cities                         | 4,417 (43.1%)                                | 1,027 (71.3%)                                          | 8,123 (78.8%)                  | 8,889 (44.9%)                                 |
| Small towns                        | 1,685 (38.8%)                                | 440 (69.6%)                                            | 4,255 (78.2%)                  | 3,868 (41.8%)                                 |
| Rural                              | 505 (28.9%)                                  | 162 (63.8%)                                            | 1,624 (76.2%)                  | 974 (24.3%)                                   |
| Missing                            | 77 (28.4%)                                   | 23 (60.5%)                                             | 221 (74.2%)                    | 127 (22.0%)                                   |
| <b>Recent registrant</b>           |                                              |                                                        |                                |                                               |
| No                                 | 6,427 (40.0%)                                | 1,610 (70.2%)                                          | 13,912 (78.4%)                 | 13,577 (41.6%)                                |
| Yes                                | 257 (49.0%)                                  | 42 (58.3%)                                             | 311 (72.5%)                    | 281 (26.6%)                                   |
| <b>Aggregated diagnosis groups</b> |                                              |                                                        |                                |                                               |
| 0 (lowest)                         | 98 (37.5%)                                   | 25 (69.4%)                                             | 312 (80.2%)                    | 483 (34.3%)                                   |
| 1-5                                | 2,219 (38.2%)                                | 564 (70.4%)                                            | 5,467 (79.0%)                  | 5,753 (40.2%)                                 |
| 6-9                                | 3,305 (40.5%)                                | 806 (68.4%)                                            | 6,592 (77.4%)                  | 6,056 (42.4%)                                 |
| 10+ (highest)                      | 1,062 (44.8%)                                | 257 (73.9%)                                            | 1,852 (78.6%)                  | 1,566 (42.8%)                                 |
| <b>Resource Utilization Bands</b>  |                                              |                                                        |                                |                                               |
| 0 (lowest)                         | 96 (37.5%)                                   | 24 (70.6%)                                             | 304 (80.0%)                    | 477 (34.4%)                                   |
| 1                                  | 196 (41.4%)                                  | 40 (66.7%)                                             | 499 (81.7%)                    | 546 (37.8%)                                   |
| 2                                  | 770 (39.1%)                                  | 199 (69.3%)                                            | 1,856 (78.4%)                  | 2,010 (39.2%)                                 |
| 3                                  | 3,788 (39.6%)                                | 934 (69.2%)                                            | 7,827 (77.7%)                  | 7,616 (42.0%)                                 |
| 4                                  | 1,305 (42.1%)                                | 296 (68.8%)                                            | 2,693 (78.4%)                  | 2,320 (42.3%)                                 |
| 5                                  | 529 (42.8%)                                  | 159 (78.3%)                                            | 1,044 (79.5%)                  | 889 (42.5%)                                   |
| <b>Self-reported health</b>        |                                              |                                                        |                                |                                               |
| Excellent                          | 1,134 (43.7%)                                | 228 (74.3%)                                            | 2,557 (81.3%)                  | 2,628 (42.1%)                                 |
| Very good                          | 2,465 (40.9%)                                | 598 (72.3%)                                            | 5,392 (80.5%)                  | 5,383 (42.8%)                                 |
| Good                               | 1,934 (39.2%)                                | 521 (69.4%)                                            | 3,942 (76.5%)                  | 3,789 (39.7%)                                 |
| Fair                               | 778 (36.6%)                                  | 209 (61.1%)                                            | 1,673 (74.5%)                  | 1,487 (39.3%)                                 |

|                                 |               |               |                |                |
|---------------------------------|---------------|---------------|----------------|----------------|
| Poor                            | 351 (40.6%)   | 88 (68.2%)    | 617 (70.7%)    | 528 (38.2%)    |
| Missing                         | 22 (40.7%)    | 8 (100.0%)    | 42 (68.9%)     | 43 (35.2%)     |
| <b>Education</b>                |               |               |                |                |
| Less than high School           | 666 (40.9%)   | 143 (67.8%)   | 1,223 (76.8%)  | 1,362 (35.0%)  |
| High School                     | 1,336 (40.9%) | 346 (73.0%)   | 2,880 (80.4%)  | 2,798 (39.3%)  |
| Some college or university      | 622 (41.2%)   | 175 (81.0%)   | 1,331 (80.0%)  | 1,266 (41.6%)  |
| College or Trade                | 1,719 (39.9%) | 385 (68.0%)   | 3,788 (77.5%)  | 3,666 (43.6%)  |
| Bachelor's degree               | 1,525 (39.6%) | 396 (67.2%)   | 3,306 (77.7%)  | 3,117 (42.4%)  |
| Graduate or professional degree | 762 (39.6%)   | 189 (66.8%)   | 1,604 (77.0%)  | 1,555 (43.3%)  |
| Missing                         | 54 (47.4%)    | 18 (72.0%)    | 91 (77.8%)     | 94 (38.1%)     |
| <b>Financial situation</b>      |               |               |                |                |
| Very comfortable                | 1,077 (43.3%) | 266 (75.8%)   | 2,365 (81.8%)  | 2,230 (43.1%)  |
| Comfortable                     | 3,978 (40.1%) | 1,005 (71.2%) | 8,620 (79.0%)  | 8,590 (41.9%)  |
| Tight/Very tight/Poor           | 1,444 (38.4%) | 339 (63.0%)   | 2,897 (73.6%)  | 2,686 (37.9%)  |
| Missing                         | 185 (42.2%)   | 42 (66.7%)    | 341 (77.1%)    | 352 (39.9%)    |
| <b>Language</b>                 |               |               |                |                |
| English                         | 5,890 (39.9%) | 1,494 (70.6%) | 13,153 (78.7%) | 12,794 (42.6%) |
| Other                           | 780 (43.0%)   | 156 (64.2%)   | 1,054 (72.9%)  | 1,051 (29.4%)  |
| Missing                         | 14 (48.3%)    | <=5 (40.0%)   | 16 (80.0%)     | 13 (22.8%)     |

**Supplemental Table S3. Full Parameter Estimates for Regression Models**

**a. Same/next day access when sick**

| Variables                         | Labels                          | Odds Ratio (95% CI) |                     |                      |
|-----------------------------------|---------------------------------|---------------------|---------------------|----------------------|
|                                   |                                 | Big cities          | Small towns         | Rural                |
| Age                               | Years                           | 1.01 (1.003, 1.008) | 1.00 (1.000, 1.009) | 1.00 (0.995, 1.010)  |
| Aggregated diagnosis groups (ADG) | Medium (6-9)                    | 1.07 (0.980, 1.177) | 1.06 (0.918, 1.226) | 1.03 (0.812, 1.315)  |
|                                   | High (10+)                      | 1.26 (1.102, 1.438) | 1.17 (0.943, 1.460) | 1.45 (0.992, 2.114)  |
|                                   | Low (0-5) - ref                 | 1.00                | 1.00                | 1.00                 |
| Education                         | Less than high School           | 1.30 (1.082, 1.559) | 1.35 (0.993, 1.838) | 1.37 (0.787, 2.402)  |
|                                   | High School                     | 1.27 (1.095, 1.465) | 1.18 (0.892, 1.551) | 1.38 (0.815, 2.349)  |
|                                   | Some college or university      | 1.27 (1.065, 1.505) | 1.25 (0.905, 1.717) | 1.28 (0.709, 2.293)  |
|                                   | College or Trade                | 1.18 (1.027, 1.348) | 1.14 (0.872, 1.490) | 1.37 (0.809, 2.305)  |
|                                   | Bachelor's degree               | 1.06 (0.932, 1.212) | 1.03 (0.776, 1.369) | 1.07 (0.616, 1.865)  |
|                                   | Graduate/professional – ref     | 1.00                | 1.00                | 1.00                 |
| Financial situation               | Very comfortable                | 1.22 (1.059, 1.400) | 1.17 (0.935, 1.458) | 1.28 (0.871, 1.889)  |
|                                   | Comfortable                     | 1.02 (0.923, 1.132) | 1.11 (0.938, 1.308) | 1.33 (1.001, 1.762)  |
|                                   | Tight/Very tight/Poor - ref     | 1.00                | 1.00                | 1.00                 |
| Recent immigrant                  | No                              | 0.70 (0.581, 0.852) | 0.94 (0.379, 2.327) | 1.09 (0.108, 10.905) |
|                                   | Yes - ref                       | 1.00                | 1.00                | 1.00                 |
| Models of care                    | Family Health Team              | 0.88 (0.791, 0.983) | 0.82 (0.681, 0.976) | 0.74 (0.514, 1.078)  |
|                                   | Capitation                      | 0.78 (0.704, 0.865) | 0.71 (0.581, 0.871) | 1.06 (0.688, 1.637)  |
|                                   | Not Rostered                    | 1.02 (0.893, 1.168) | 0.78 (0.592, 1.032) | 1.08 (0.683, 1.706)  |
|                                   | Enhanced Fee For Services - ref | 1.00                | 1.00                | 1.00                 |
| Self-reported health              | Very good                       | 0.94 (0.834, 1.059) | 0.79 (0.651, 0.960) | 0.76 (0.538, 1.071)  |
|                                   | Good                            | 0.81 (0.716, 0.924) | 0.77 (0.626, 0.950) | 0.82 (0.574, 1.172)  |
|                                   | Fair                            | 0.69 (0.586, 0.808) | 0.72 (0.556, 0.924) | 0.72 (0.469, 1.113)  |
|                                   | Poor                            | 0.81 (0.649, 1.005) | 0.64 (0.454, 0.902) | 0.84 (0.477, 1.482)  |
|                                   | Excellent - ref                 | 1.00                | 1.00                | 1.00                 |
| Sex                               | Female                          | 1.02 (0.937, 1.107) | 0.96 (0.836, 1.097) | 0.88 (0.705, 1.104)  |
|                                   | Male - ref                      | 1.00                | 1.00                | 1.00                 |

**b. Satisfaction with time to visit when sick**

| Variables                                | Labels                                 | Odds Ratio (95% CI) |                     |                     |
|------------------------------------------|----------------------------------------|---------------------|---------------------|---------------------|
|                                          |                                        | Big cities          | Small towns         | Rural               |
| <b>Age</b>                               | Years                                  | 1.01 (1.003, 1.019) | 1.02 (1.003, 1.029) | 1.01 (0.984, 1.027) |
| <b>Aggregated diagnosis groups (ADG)</b> | Medium (6-9)                           | 0.76 (0.578, 1.008) | 1.22 (0.796, 1.860) | 0.84 (0.428, 1.638) |
|                                          | High (10+)                             | 1.08 (0.718, 1.634) | 1.66 (0.852, 3.217) | 1.55 (0.528, 4.542) |
|                                          | Low (0-5) - <b>ref</b>                 | 1.00                | 1.00                | 1.00                |
| <b>Education</b>                         | Less than high School                  | 1.59 (0.873, 2.898) | 2.01 (0.833, 4.833) | 0.32 (0.066, 1.527) |
|                                          | High School                            | 1.71 (1.100, 2.647) | 2.11 (0.987, 4.518) | 0.80 (0.174, 3.658) |
|                                          | Some college or university             | 2.31 (1.318, 4.045) | 3.53 (1.357, 9.164) | 1.39 (0.233, 8.347) |
|                                          | College or Trade                       | 1.18 (0.794, 1.768) | 1.99 (0.942, 4.209) | 0.31 (0.071, 1.328) |
|                                          | Bachelor's degree                      | 0.99 (0.682, 1.439) | 1.71 (0.789, 3.696) | 0.31 (0.069, 1.356) |
|                                          | Graduate/professional - <b>ref</b>     | 1.00                | 1.00                | 1.00                |
| <b>Financial situation</b>               | Very comfortable                       | 2.29 (1.480, 3.548) | 0.89 (0.454, 1.733) | 2.65 (0.890, 7.901) |
|                                          | Comfortable                            | 1.43 (1.064, 1.926) | 1.27 (0.802, 2.025) | 1.89 (0.902, 3.949) |
|                                          | Tight/Very Tight/Poor - <b>ref</b>     | 1.00                | 1.00                | 1.00                |
| <b>Recent immigrant</b>                  | No                                     | 1.49 (0.858, 2.601) | 0.00 (--, --)       | 1.15 (0.419, 3.161) |
|                                          | Yes - <b>ref</b>                       | 1.00                | 1.00                | 1.00                |
| <b>Models of care</b>                    | Family Health Team                     | 1.16 (0.825, 1.620) | 0.84 (0.468, 1.500) | 2.08 (0.605, 7.179) |
|                                          | Capitation                             | 0.91 (0.672, 1.239) | 0.73 (0.388, 1.368) | 2.40 (0.637, 9.080) |
|                                          | Not Rostered                           | 1.28 (0.841, 1.960) | 0.77 (0.336, 1.766) | 0.47 (0.165, 1.346) |
|                                          | Enhanced Fee For Services - <b>ref</b> | 1.00                | 1.00                | 1.00                |
| <b>Self-reported health</b>              | Very good                              | 1.02 (0.682, 1.518) | 0.79 (0.419, 1.471) | 0.77 (0.253, 2.343) |
|                                          | Good                                   | 0.82 (0.545, 1.232) | 0.70 (0.363, 1.367) | 0.48 (0.129, 1.756) |
|                                          | Fair                                   | 0.51 (0.314, 0.824) | 0.34 (0.164, 0.722) | 0.18 (0.034, 0.930) |
|                                          | Poor                                   | 1.26 (0.614, 2.604) | 0.52 (0.196, 1.393) | 1.07 (0.583, 1.976) |
|                                          | Excellent - <b>ref</b>                 | 1.00                | 1.00                | 1.00                |
| <b>Sex</b>                               | Female                                 | 0.86 (0.665, 1.100) | 0.87 (0.589, 1.293) | 1.01 (0.984, 1.027) |
|                                          | Male - <b>ref</b>                      | 1.00                | 1.00                | 1.00                |

### c. Telephone access

| Variables                         | Labels                          | Odds Ratio (95% CI) |                     |                     |
|-----------------------------------|---------------------------------|---------------------|---------------------|---------------------|
|                                   |                                 | Big cities          | Small towns         | Rural               |
| Age                               | Years                           | 1.01 (1.006, 1.013) | 1.01 (1.007, 1.016) | 1.00 (0.994, 1.008) |
| Aggregated diagnosis groups (ADG) | Medium (6-9)                    | 0.87 (0.779, 0.971) | 1.08 (0.926, 1.264) | 0.86 (0.686, 1.084) |
|                                   | High (10+)                      | 1.01 (0.854, 1.190) | 1.06 (0.829, 1.357) | 0.97 (0.654, 1.441) |
|                                   | Low (0-5) - ref                 | 1.00                | 1.00                | 1.00                |
| Education                         | Less than high School           | 1.03 (0.816, 1.293) | 1.40 (1.004, 1.957) | 1.45 (0.895, 2.358) |
|                                   | High School                     | 1.34 (1.119, 1.606) | 1.52 (1.142, 2.025) | 1.73 (1.109, 2.714) |
|                                   | Some college or university      | 1.49 (1.194, 1.861) | 1.29 (0.929, 1.798) | 1.60 (0.951, 2.690) |
|                                   | College or Trade                | 1.06 (0.899, 1.242) | 1.36 (1.037, 1.791) | 1.37 (0.889, 2.119) |
|                                   | Bachelor's degree               | 1.00 (0.852, 1.163) | 1.33 (0.993, 1.771) | 1.44 (0.906, 2.276) |
|                                   | Graduate/professional - ref     | 1.00                | 1.00                | 1.00                |
| Financial situation               | Very comfortable                | 1.47 (1.237, 1.747) | 1.37 (1.077, 1.742) | 1.34 (0.924, 1.947) |
|                                   | Comfortable                     | 1.20 (1.064, 1.355) | 1.39 (1.167, 1.647) | 1.06 (0.816, 1.374) |
|                                   | Tight/Very Tight/Poor - ref     | 1.00                | 1.00                | 1.00                |
| Recent immigrant                  | No                              | 1.18 (0.931, 1.498) | 1.67 (0.667, 4.170) | 0.91 (0.100, 8.267) |
|                                   | Yes - ref                       | 1.00                | 1.00                | 1.00                |
| Models of care                    | Family Health Team              | 1.15 (1.002, 1.309) | 0.78 (0.630, 0.965) | 0.72 (0.481, 1.076) |
|                                   | Capitation                      | 1.04 (0.915, 1.175) | 0.85 (0.674, 1.083) | 1.05 (0.658, 1.689) |
|                                   | Not Rostered                    | 0.95 (0.806, 1.125) | 0.81 (0.597, 1.094) | 0.88 (0.532, 1.454) |
|                                   | Enhanced Fee For Services - ref | 1.00                | 1.00                | 1.00                |
| Self-reported health              | Very good                       | 0.96 (0.829, 1.112) | 0.96 (0.777, 1.192) | 0.83 (0.591, 1.179) |
|                                   | Good                            | 0.75 (0.639, 0.873) | 0.68 (0.544, 0.854) | 0.63 (0.445, 0.906) |
|                                   | Fair                            | 0.67 (0.550, 0.805) | 0.50 (0.381, 0.653) | 0.69 (0.455, 1.060) |
|                                   | Poor                            | 0.62 (0.477, 0.804) | 0.51 (0.354, 0.722) | 0.49 (0.278, 0.855) |
|                                   | Excellent - ref                 | 1.00                | 1.00                | 1.00                |
| Sex                               | Female                          | 1.05 (0.943, 1.158) | 0.97 (0.831, 1.123) | 0.80 (0.640, 1.002) |
|                                   | Male - ref                      | 1.00                | 1.00                | 1.00                |

#### d. Awareness of after-hours clinic

| Variables                         | Labels                          | Odds Ratio (95% CI) |                     |                     |
|-----------------------------------|---------------------------------|---------------------|---------------------|---------------------|
|                                   |                                 | Big cities          | Small towns         | Rural               |
| Age                               | Years                           | 1.01 (1.006, 1.009) | 1.00 (0.996, 1.002) | 1.00 (0.995, 1.005) |
| Aggregated diagnosis groups (ADG) | Medium (6-9)                    | 1.00 (0.932, 1.063) | 1.21 (1.101, 1.339) | 1.19 (1.007, 1.400) |
|                                   | High (10+)                      | 1.04 (0.942, 1.159) | 1.13 (0.963, 1.338) | 1.36 (1.009, 1.822) |
|                                   | Low (0-5) - ref                 | 1.00                | 1.00                | 1.00                |
| Education                         | Less than high School           | 0.75 (0.655, 0.852) | 0.82 (0.667, 1.013) | 0.77 (0.539, 1.112) |
|                                   | High School                     | 0.92 (0.827, 1.025) | 0.91 (0.749, 1.097) | 0.76 (0.539, 1.073) |
|                                   | Some college or university      | 1.02 (0.899, 1.165) | 0.99 (0.792, 1.232) | 0.83 (0.558, 1.223) |
|                                   | College or Trade                | 1.11 (1.003, 1.231) | 0.98 (0.814, 1.184) | 0.96 (0.686, 1.353) |
|                                   | Bachelor's degree               | 1.00 (0.902, 1.099) | 1.01 (0.826, 1.226) | 0.87 (0.608, 1.253) |
|                                   | Graduate/professional – ref     | 1.00                | 1.00                | 1.00                |
| Financial situation               | Very comfortable                | 1.19 (1.073, 1.320) | 1.10 (0.944, 1.287) | 0.89 (0.686, 1.165) |
|                                   | Comfortable                     | 1.12 (1.035, 1.207) | 1.08 (0.965, 1.216) | 1.02 (0.842, 1.237) |
|                                   | Tight/Very Tight/Poor - ref     | 1.00                | 1.00                | 1.00                |
| Recent immigrant                  | No                              | 1.67 (1.431, 1.947) | 1.22 (0.643, 2.312) | 0.85 (0.265, 2.754) |
|                                   | Yes - ref                       | 1.00                | 1.00                | 1.00                |
| Models of care                    | Family Health Team              | 2.59 (2.391, 2.810) | 1.71 (1.503, 1.944) | 1.17 (0.890, 1.550) |
|                                   | Capitation                      | 1.90 (1.758, 2.044) | 1.29 (1.118, 1.488) | 1.35 (0.985, 1.862) |
|                                   | Not Rostered                    | 0.86 (0.772, 0.948) | 0.76 (0.629, 0.925) | 1.03 (0.734, 1.458) |
|                                   | Enhanced Fee For Services - ref | 1.00                | 1.00                | 1.00                |
| Self-reported health              | Very good                       | 1.10 (1.007, 1.191) | 1.01 (0.888, 1.141) | 0.81 (0.653, 1.003) |
|                                   | Good                            | 0.96 (0.881, 1.057) | 0.93 (0.807, 1.063) | 0.80 (0.637, 1.007) |
|                                   | Fair                            | 0.98 (0.866, 1.098) | 0.93 (0.776, 1.107) | 0.61 (0.452, 0.828) |
|                                   | Poor                            | 0.88 (0.738, 1.045) | 0.94 (0.731, 1.211) | 0.71 (0.465, 1.089) |
|                                   | Excellent - ref                 | 1.00                | 1.00                | 1.00                |
| Sex                               | Female                          | 1.41 (1.330, 1.503) | 1.34 (1.227, 1.474) | 1.14 (0.976, 1.327) |
|                                   | Male - ref                      | 1.00                | 1.00                | 1.00                |
