# Supplementary material
Source: PubMed Central journal article supplement (PMC7207031)
Supplement: supp_8.2.E328_2019-0063-original-submission.pdf [file supp_8.2.E328_2019-0063-original-submission.pdf]

1  
2  
3  
4  
5  
6 **The association of physician payment and team-based care with timely access in primary**  
7 **care: a population-based cross sectional study**  
8

9 Tara Kiran<sup>1, 2, 3,4</sup> MD, MSc [tara.kiran@utoronto.ca](mailto:tara.kiran@utoronto.ca)

10  
11 Michael E. Green<sup>5,6</sup> MD, MPH<sup>5,6</sup> [michael.green@dfm.queensu.ca](mailto:michael.green@dfm.queensu.ca)

12  
13 Yvonne DeWitt<sup>5</sup> MSc [ydewit@hpeph.ca](mailto:ydewit@hpeph.ca)

14  
15 Shahriar Khan<sup>5</sup> MSc [Shahriar.Khan@ices.on.ca](mailto:Shahriar.Khan@ices.on.ca)

16  
17 Sue Schultz<sup>3</sup> MSc [sue.schultz@ices.on.ca](mailto:sue.schultz@ices.on.ca)

18  
19 Alexander Kopp<sup>3</sup> BA [alexander.kopp@ices.on.ca](mailto:alexander.kopp@ices.on.ca)

20  
21 Naira Yeritsyan<sup>4</sup> MD, MPH [Naira.Yeritsyan@hqontario.ca](mailto:Naira.Yeritsyan@hqontario.ca)

22  
23 Haj Ali Wissam<sup>4</sup> MPH CPH [Wissam.haj.ali@gmail.com](mailto:Wissam.haj.ali@gmail.com)

24  
25 Richard H Glazier<sup>1, 2, 3</sup> MD, MPH [rick.glazier@ices.on.ca](mailto:rick.glazier@ices.on.ca)

26  
27 <sup>1</sup>Department of Family and Community Medicine and the Centre for Urban Health Solutions  
28 in the Li Ka Shing Knowledge Institute, St. Michael's Hospital, Toronto, Ontario

29  
30 <sup>2</sup>Department of Family and Community Medicine, Faculty of Medicine, University of Toronto,  
31 Toronto, Ontario

32  
33 <sup>3</sup>Institute for Clinical Evaluative Sciences, Toronto, Ontario

34  
35 <sup>4</sup>Health Quality Ontario

36  
37 <sup>5</sup>Institute for Clinical Evaluative Sciences, Kingston, Ontario

38  
39 <sup>6</sup>Centre for Health Services and Policy Research, Queens University, Kingston, Canada

40  
41 **Send correspondence to:**

42  
43 Dr. Tara Kiran, Health Centre at 80 Bond, 80 Bond Street, Toronto, Ontario, Canada M5B 1X1;  
44 [tara.kiran@utoronto.ca](mailto:tara.kiran@utoronto.ca); phone (416) 864-3011; fax (416) 864-3099  
45  
46  
47  
48  
49

1  
2  
3  
4  
5  
6 Word count: 2912  
7 Number of Tables: 2  
8 Number of Figures: 4  
9

### 10 **Funding statement**

11  
12  
13 This study was supported by ICES, which is funded by an annual grant from the Ontario  
14 Ministry of Health and Long-Term Care (MOHLTC) and also by the Toronto Central Local  
15 Health Integration Network (LHIN). As well, this study was supported by the INSPIRE Primary  
16 Health Care Research Program which is funded through the Health Systems Research  
17 Program of the Ontario Ministry of Health and Long Term Care. The opinions, results and  
18 conclusions reported in this paper are those of the authors and are independent from the  
19 funding sources. No endorsement by ICES, Toronto Central LHIN or the Ontario MOHLTC is  
20 intended or should be inferred.  
21  
22  
23

24 Drs. Kiran and Glazier are supported as Clinician Scientists by the Department of Family and  
25 Community Medicine at the University of Toronto and at St. Michael's Hospital. Dr. Kiran is  
26 the Fidani Chair in Improvement and Innovation at the University of Toronto. She is also  
27 supported by the Canadian Institutes of Health Research and Health Quality Ontario as an  
28 Embedded Clinician Researcher. Dr. Green is supported by the Brian Hennen Chair in Family  
29 Medicine at Queen's University.  
30  
31  
32  
33

### 34 **Conflicts of interest**

35 The authors declare no conflicts of interest.  
36  
37

### 38 **Author contributions**

39 TK and RG conceived of the study. TK, MG, YD, SS, AK, NY, HW, and RG designed the study.  
40 YD and SK conducted the analysis. All authors interpreted the data. TK drafted the  
41 manuscript and all authors critically reviewed it. All authors read and approved the final  
42 manuscript  
43  
44  
45  
46  
47  
48  
49  
50  
51  
52  
53  
54  
55  
56  
57  
58  
59  
60

## Abstract

**Background:** North Americans report challenges with timely access to primary care. It is unclear how patient-reported access differs by physician payment and participation in team-based care.

**Methods:** We conducted a cross-sectional analysis of adult Ontarians responding to a provincial survey between January 2013 and September 2015 who reported having a primary care provider and had responses linked to administrative health data (n=24,682). Access measures included the proportion of patients reporting i) same/next day access when sick; ii) satisfaction with time to appointment when sick; iii) telephone access and iv) knowledge of an after-hours clinic. We tested the association between practice model and measures of access using logistic regression after stratifying for rurality.

**Results:** In big cities, patients in team and non-team capitation models were less likely to report same/next day access when sick compared to patients in enhanced fee-for-service models (team-capitation: 43%, aOR 0.88(0.79-0.98); non-team capitation: 39%, aOR 0.78(0.70-0.87); enhanced fee-for-service 46%, reference). In contrast, patients in team and non-team capitation models were more likely to report that their provider had an after-hours clinic (team-capitation: 59%, aOR 2.59(2.39-2.81); non-team capitation: 51% 1.90(1.76-2.04); enhanced fee-for service: 34%, reference). Patterns were similar for patients

1  
2  
3 in small towns. There was minimal to no difference by model for satisfaction with time to  
4  
5  
6 appointment or telephone access.  
7  
8  
9

10 **Conclusions:** In our setting, there was an association between some types of access and  
11  
12 physician payment and team-based care but the direction was not consistent. Different  
13  
14 measures of timely access are needed to understand health system performance.  
15  
16  
17  
18  
19  
20  
21  
22  
23  
24  
25  
26  
27  
28  
29  
30  
31  
32  
33  
34  
35  
36  
37  
38  
39  
40  
41  
42  
43  
44  
45  
46  
47  
48  
49  
50  
51  
52  
53  
54  
55  
56  
57  
58  
59  
60

Confidential

## INTRODUCTION

Health systems with strong primary care have better health outcomes, lower costs, and fewer inequities(1). First contact access is one of the pillars of primary care(2) yet in both Canada and the United States, timely access to primary care continues to be a challenge. Only 43% of patients in Canada and 51% in the US report being able to get an appointment the same or next day when sick compared to 77% in the Netherlands(3). Similarly, only 34% in Canada and 42% in the US say it was easy or very easy to get medical care in the evening, weekends or holidays without going to the emergency department compared to 72% in the Netherlands(3). Both Canada and the US also have among the highest rates of emergency department use with many patients reporting they went to the emergency department for a condition that could have been managed in primary care(3).

Jurisdictions in both Canada and the United States have made investments to strengthen the primary care system by supporting practices to transition to medical homes(4, 5). Medical homes typically incorporate blended payment for physicians, a focus on quality and safety, and mechanisms for enhanced access(6, 7). In Ontario, reforms have included options for physicians to transition from fee-for-service to blended capitation and also apply for funding for non-physician health professionals to join their team(8). Capitation theoretically supports the care of patients with multiple chronic conditions incentivizing proactive follow-up, non-visit based care, and addressing multiple issues at one appointment. However, capitation provides little incentive to see a high volume of patients and reduced access is a known concern(9). In

1  
2  
3 contrast, sharing the care with non-physician health professionals is a known strategy to  
4  
5 improve access(10-12).  
6  
7  
8  
9

10 Our study aimed to understand the association between timely and after-hours access and  
11  
12 physician payment and participation in team-based care. We also sought to assess how access  
13  
14 varied by patient characteristics. Little research to date has evaluated the association between  
15  
16 access and physician payment and organization. We hope that lessons from our setting can  
17  
18 inform other jurisdictions contemplating similar reforms.  
19  
20  
21  
22  
23  
24

## 25 **METHODS**

### 26 **Setting and Context**

27  
28  
29  
30 Ontario is Canada's largest province with a population of 14.3 million in 2018. Primary care  
31  
32 physician services are fully insured for all permanent residents through the Ontario Health  
33  
34 Insurance Plan (OHIP) with no co-payments or deductibles. Primary care physician payment and  
35  
36 organization has shifted over the last fifteen years. In 2002, most physicians worked  
37  
38 independently and billed fee-for-service. Now, most physicians are organized in groups, with  
39  
40 formal patient enrolment, some degree of blended payments, and mandated after-hours  
41  
42 coverage(8). There are three dominant practice models: enhanced fee-for-service (85% fee-for-  
43  
44 service, 15% capitation and bonuses, no funding for non-physician health professionals); non-  
45  
46 team capitation (20% fee-for-service, 80% capitation and bonuses, no funding for non-physician  
47  
48 health professionals), and team capitation (20% fee-for-service, 80% capitation and bonuses,  
49  
50  
51  
52  
53  
54  
55  
56  
57  
58  
59  
60

1  
2  
3 and funding for non-physician health professionals). Approximately one in six Ontarians are not  
4  
5 formally enrolled to a physician practicing in a new model(13). Ontario includes some densely  
6  
7 populated urban areas, smaller towns and cities, and also some rural and remote regions with  
8  
9 unique health service challenges. For example, in rural and remote areas, primary care  
10  
11 physicians often staff the emergency room, provide inpatient care, deliver babies, and provide  
12  
13 other services in addition to maintaining an office practice. New practice models are unevenly  
14  
15 distributed across the province(14).  
16  
17  
18  
19  
20  
21

## 22 **Study Design and Population**

23  
24 We conducted a cross-sectional analysis of Ontario residents to understand the determinants of  
25  
26 timely access to primary care including patient characteristics, type of physician practice model,  
27  
28 and rurality. We included Ontarians age 16 and over who responded to the provincial Health  
29  
30 Care Experience Survey (HCES) between January 1, 2013 and September 30, 2015, agreed to  
31  
32 link their responses with administrative health data, reported having a primary care provider,  
33  
34 had valid provincial health insurance, and had contact with the health system in the last 7-9  
35  
36 years. We did not have billing data for Community Health Centres in the province so excluded  
37  
38 patients who visited a Community Health Centre in the last two years. These datasets were  
39  
40 linked using unique encoded identifiers and analyzed at the Institute for Clinical Evaluative  
41  
42 Sciences (ICES). The use of data in this project was authorized under section 45 of Ontario's  
43  
44 Personal Health Information Protection Act, which does not require review by a Research Ethics  
45  
46 Board.  
47  
48  
49  
50  
51  
52  
53  
54  
55  
56  
57  
58  
59  
60

### Measures of timely access

The HCES is a voluntary telephone survey introduced by Ontario's Ministry of Health and Long-Term Care in 2012 to understand the public's experience with various aspects of the health care system including primary care. The survey is conducted by the Institute for Social Research at York University. The public is sampled using the Registered Persons Database (RPDB) which contains personal and demographic data for all current and previous OHIP registrants.

Approximately 11,200 15-minute interviews are conducted annually using a sampling frame that accounts for geography. The survey runs continuously with data provided to government in three-month waves. Our study includes data from Wave 2 (first wave with full survey implemented) to Wave 16 (most recent data linked to administrative databases).

Our primary analysis included four HCES questions related to timely primary care access: i) percentage responding they saw their provider "same day" or "next day" when sick; ii) percentage responding that, when sick, the time between making the appointment and the actual visit was "about right" (question included in wave 15 and 16 only); iii) percentage responding their provider or someone in their office "always" or "often" spoke to them or got back to them the same day they called, and iv) percentage responding "yes" to whether their provider has an after-hours clinic where patients can be seen by or talk to a doctor or nurse when the provider's office is closed (Figure 1). For our main analyses, we did not include the question "the last time when you needed medical care in the evening, on a weekend, or on a public holiday, how easy or difficult was it to get care without going to the emergency



1  
2  
3 department?" because we felt it related to health system factors that were beyond the control  
4  
5 of a primary care practice, such as the availability of walk-in clinics. We analyzed responses  
6  
7 related to email use and online booking descriptively given the small number of affirmative  
8  
9 responses. For each question, we excluded missing and "don't know/refused" responses from  
10  
11 the denominator with the exception of after-hours awareness where "don't know/refused" was  
12  
13 coded together with no.  
14  
15  
16  
17  
18  
19

### 20 **Other variables**

21  
22  
23  
24  
25 We obtained the following demographic variables from the HCES survey: self-rated health  
26  
27 (excellent, very good, good, fair, poor), level of education (some or less than high school, high  
28  
29 school graduate or equivalent, some college or university, completed community college,  
30  
31 completed bachelor's degree, graduate or professional degree), financial situation (very  
32  
33 comfortable, comfortable, tight/very tight/poor), and language most spoken at home (English,  
34  
35 other). We obtained other demographic variables from administrative data. We determined  
36  
37 age, sex, and postal code from the RPDB. We used postal code to derive neighbourhood income  
38  
39 quintile (an area-based proxy for poverty used only when comparing demographics of survey  
40  
41 respondents to the general population). We calculated rurality using the Rurality Index of  
42  
43 Ontario (RIO 0-9 Urban; RIO 10-39 Small towns, RIO 40+ Rural)(15). We used OHIP registration  
44  
45 within the last ten years as a proxy for immigration. We used the Johns Hopkins Adjusted  
46  
47 Clinical Groups software to measure co-morbidity using Aggregated Diagnosis Groups (ADGs)  
48  
49 and morbidity using Resource Utilization Bands (RUBs) assigned based on similar healthcare  
50  
51  
52  
53  
54  
55  
56  
57  
58  
59  
60

1  
2  
3 use, each calculated using data from a two-year period. Survey respondents were assigned to a  
4  
5 physician practice model based on enrolment tables and for our main analysis they were  
6  
7 categorized as enrolled to a physician in enhanced fee-for-service (Family Health Group or  
8  
9 Comprehensive Care Model), non-team capitation (Family Health Organization or Family Health  
10  
11 Network), or team capitation (Family Health Team) or as not enrolled.  
12  
13  
14  
15  
16  
17

### 18 **Analysis**

19  
20 We compared demographic characteristics of HCES survey respondents with the general  
21  
22 population of Ontario. We conducted bivariate analysis to examine the relationship between  
23  
24 timely access and both patient demographics and practice model. We stratified bivariate  
25  
26 analyses by rurality because we hypothesized *a priori* that the relationship between practice  
27  
28 model and access may differ by rurality. We used multivariable logistic regression to  
29  
30 understand the relationship between practice model and timely access after controlling for  
31  
32 patient demographics. We included variables that we hypothesized as potential confounders a  
33  
34 priori (age, sex, education, tight financial situation, self-rated health, co-morbidity and recent  
35  
36 registration). We did not include RUB as it was significantly correlated with ADG and likewise  
37  
38 excluded language as it was significantly correlated with recent OHIP registration. We initially  
39  
40 included rurality in the model as well as an interaction term for rurality and practice model.  
41  
42 There was a significant interaction between rurality and practice model so we ran separate  
43  
44 logistic regression models for big cities, small towns, and rural areas.  
45  
46  
47  
48  
49  
50  
51  
52  
53

### 54 **RESULTS**

1  
2  
3  
4  
5  
6 39,665 Ontarians responded to the health care experience survey between January 2013 and  
7  
8 September 2015 with 36,792 agreeing to link their responses to health administrative data.  
9  
10 Compared to the general population, survey respondents were older, had more co-morbidities  
11  
12 and were more likely to reside in a rural area, live in a higher income neighbourhood, and be a  
13  
14 long-term resident of Ontario (Appendix, Exhibit 1). We analyzed data for 33,810 individuals  
15  
16 who met our inclusion criteria (Figure 1).  
17  
18  
19  
20  
21

22  
23 Forty percent of patients reported getting a same or next day appointment when sick, 70%  
24  
25 rated the length of the time they waited for an appointment when sick as just right, 78%  
26  
27 reported their provider always or often responded to a telephone call about a medical concern  
28  
29 the same day, and 41% said their physician had an after-hours clinic. Patients living in rural  
30  
31 areas as well as those with fair health and a tight financial situation generally reported poorer  
32  
33 access in all categories (Table 1). New residents of Ontario and those speaking a language other  
34  
35 than English at home reported higher same/next day access when sick but poorer access via  
36  
37 telephone, no after-hours clinics, and lower satisfaction with the time to appointment. Less  
38  
39 than 4% of Ontarians reported emailing with their physician in the last 12 months and 11%  
40  
41 reported being able to book an appointment on-line or via email. The percentage responding it  
42  
43 was easy or very easy to get care without going to the emergency department ranged from 53%  
44  
45 in urban areas to 25% in rural areas.  
46  
47  
48  
49  
50  
51  
52  
53  
54  
55  
56  
57  
58  
59  
60

1  
2  
3 Only 14% percent of respondents from wave 15 and 16 reported good access for all four  
4 questions (Figure 2). The percentage reporting good access for all questions was lowest in rural  
5 areas (6%) and Family Health Teams (13%). Figure 3 illustrates the overlap in responses for  
6 access to care when sick and satisfaction with time to booked appointment. Of patients who  
7 reported a same or next day visit when sick, 91% were also satisfied with the time to visit. In  
8 contrast, 50% of people who reported being satisfied with the time to visit reported having a  
9 same or next day visit.

10  
11  
12  
13  
14  
15  
16  
17  
18  
19  
20  
21  
22  
23 Table 2 summarizes the crude responses to the access questions by physician practice model  
24 after stratifying by rurality. Patients in rural areas reported poorer access generally, especially  
25 access to care when sick and satisfaction with time to appointment. There was variation in  
26 access by physician practice model, even within rural strata.

27  
28  
29  
30  
31  
32  
33  
34  
35 Figure 3 presents the unadjusted and adjusted odds of patients reporting favourable access  
36 by practice model, stratified by rurality. In big cities, patients in team and non-team  
37 capitation models were less likely to report same/next day access when sick compared to  
38 patients in enhanced fee-for-service models even after adjustment for patient demographics  
39 (team-capitation: 43%, adjusted odds ratio (aOR) 0.88 (0.79-0.98); non-team capitation: 39%,  
40 aOR 0.78 (0.70-0.87); enhanced fee-for-service 46%, reference). In contrast, patients in team  
41 and non-team capitation models were more likely to report that their provider had an after-  
42 hours clinic (team-capitation: 59%, aOR 2.59 (2.39-2.81); non-team capitation: 51% 1.90  
43 (1.76-2.04); enhanced fee-for service: 34%, reference). In small towns, the relationships  
44  
45  
46  
47  
48  
49  
50  
51  
52  
53  
54  
55  
56  
57  
58  
59  
60

1  
2  
3 between model and same/next day access and after-hours awareness was similar to the  
4  
5 relationships noted in big cities. For telephone access, patients in team-capitation reported  
6  
7 more favourable access in big cities and less favourable access in small towns relative to  
8  
9 patients in enhanced fee-for-service but there were no other differences by model. There  
10  
11 were no significant differences by model for satisfaction for time to an appointment. There  
12  
13 were also no significant differences in access by model for patients in rural areas. Full  
14  
15 parameter estimates are presented in the Appendix.  
16  
17  
18  
19  
20  
21

## 22 **DISCUSSION**

23  
24  
25  
26  
27 We found that, compared to patients enrolled to physicians paid primarily by fee-for-service,  
28  
29 patients enrolled to physicians paid mostly via capitation were significantly less likely to report  
30  
31 having a same or next day visit when sick but significantly more likely to report that their  
32  
33 provider had an after-hours clinic. Compared to patients in non-team capitation practice,  
34  
35 patients in team-based capitation practices reported somewhat better same or next day access  
36  
37 and were more likely to report their provider had an after-hours clinic. These differences  
38  
39 existed in both big cities and small towns even after adjustment for patient factors. Reported  
40  
41 telephone access and satisfaction with time to visit were moderate to high overall with few  
42  
43 consistent differences by practice model. Access was strongly influenced by rurality with  
44  
45 patients in rural areas consistently reporting much poorer access, with no significant  
46  
47 differences in access by model in rural settings.  
48  
49  
50  
51  
52  
53  
54  
55  
56  
57  
58  
59  
60

1  
2  
3 Our results highlight the importance of measuring timely access in primary care in multiple  
4 ways. Our finding of low reported same or next day visits when sick echo other reports (3).  
5  
6 However, in our study, one-third of respondents said they were satisfied with the time to visit  
7  
8 even though the visit was not on the same or next day. This discrepancy highlights the  
9  
10 limitations of evaluating access or targeting related improvements using a measure of same or  
11  
12 next day visit – a measure favoured by news media and politicians(16, 17). Even so, it is  
13  
14 concerning that patients enrolled to capitation practices report lower same or next day access  
15  
16 given the goals of reforms and the higher relative income of physicians paid by capitation(8,  
17  
18 18). The finding is not surprising, though, given that reduction in service is a known risk of  
19  
20 capitation(19). In contrast, our finding of relatively poor same or next day access for patients  
21  
22 enrolled to team-based models compared to enhanced fee-for-service was contrary to our  
23  
24 expectation. Others have reported how enhanced roles for non-physician health professionals  
25  
26 can improve access(11, 12, 20) suggesting team-based care can be further optimized in Ontario.  
27  
28  
29  
30  
31  
32  
33  
34  
35  
36  
37 Ontarians reported very low rates of emailing with their provider or using email or online  
38  
39 booking to make appointments – two newer dimensions of access worthy of attention. Our  
40  
41 own engagement of patients in our practice confirmed the importance of e-communication for  
42  
43 patients(21, 22). New contracts with team-based practices in Ontario ask practices to provide  
44  
45 patients with the option of email communication(23). All physicians in new practice models  
46  
47 currently have a contractual obligation to provide shared after-hours care yet we found higher  
48  
49 awareness of after-hours clinics in capitation practices. The higher awareness may relate to  
50  
51  
52  
53  
54  
55  
56  
57  
58  
59  
60

1  
2  
3 capitation practices receiving administration grants that can be used to fund personnel to  
4  
5 support effective organization and advertisement of after-hours clinics.  
6  
7  
8

9  
10 Crude reported access differed by patient characteristics. Those with fair health and a tight  
11 financial situation generally reported poorer access in all categories. New residents of Ontario  
12 and those not speaking English had higher same or next day visits but poorer access in other  
13 categories. These findings suggest some newcomers may be seeing physicians practicing walk-  
14 in style but may also be having difficulties navigating the health care system due to language  
15 and cultural barriers. In our setting, the strongest determinant of access was rurality. Poorer  
16 reported access in rural areas is not surprising given challenges with physician supply and the  
17 necessity of rural primary care physicians to play multiple different roles both in and outside of  
18 hospital.  
19  
20  
21  
22  
23  
24  
25  
26  
27  
28  
29  
30  
31  
32  
33  
34

35 Ours is one of the first studies to report on the association between timely access and physician  
36 payment and organization. We used responses from a routinely administered provincial survey  
37 that were linked to administrative data and assessed timely access using a variety of measures.  
38  
39 However, our study has two notable limitations. First, survey respondents underrepresented  
40 some patient groups including those living in lower income neighbourhoods and newcomers to  
41 Canada. We suspect survey response bias may have led to more favourable reporting of timely  
42 access overall. Second, our study is cross-sectional. We found some differences in reported  
43 access by practice model but it is unclear if these differences pre-dated physicians joining new  
44 models.  
45  
46  
47  
48  
49  
50  
51  
52  
53  
54  
55  
56  
57  
58  
59  
60

1  
2  
3  
4  
5  
6 In summary, we found that patients enrolled to physicians paid mostly by capitation were less  
7  
8 likely to report a same or next day visit when sick but more likely to report that their provider  
9  
10 had an after-hours clinic. Within capitation practices, same or next day access was somewhat  
11  
12 better and after-hours awareness much better for physicians who received funding for non-  
13  
14 physician health professionals compared to those that did not. Our findings highlight the  
15  
16 importance of health care administrators and clinicians measuring access in multiple ways to  
17  
18 better understand areas of weakness and strength. Team-based practices likely need to  
19  
20 strengthen efforts on having non-physician health professionals share the care to improve  
21  
22 access(12). Policy-makers should carefully consider how to incentivize timely visits for  
23  
24 capitation practices given the financial disincentive to provide timely access inherent in  
25  
26 capitation payment. Changes to physician payment and organization should be prospectively  
27  
28 evaluated to understand their impact on access.  
29  
30  
31  
32  
33  
34  
35  
36  
37  
38  
39

### References

- 40 1. Starfield B, Shi L, Macinko J. Contribution of primary care to health systems and health.  
41 Milbank Quarterly. 2005;83(3):457-502.  
42
- 43 2. Starfield B. Primary care: balancing health needs, services, and technology: Religion in  
44 America; 1998.  
45  
46  
47
- 48 3. Canadian Institute for Health Information. How Canada Compares: Results From The  
49 Commonwealth Fund's 2016 International Health Policy Survey of Adults in 11 Countries.  
50 Ottawa, Ontario: CIHI; 2017.  
51  
52  
53
- 54 4. Hutchison B, LEVESQUE JF, Strumpf E, Coyle N. Primary health care in Canada: systems  
55 in motion. The Milbank Quarterly. 2011;89(2):256-88.  
56  
57  
58  
59  
60



- 1  
2  
3 5. Iglehart JK. No place like home—testing a new model of care delivery. *New England*  
4 *Journal of Medicine*. 2008;359(12):1200-2.  
5  
6
- 7  
8 6. Patient Centered Primary Care Collaborative. Joint Principles of the Patient-Centered  
9 Medical Home: Patient Centered Primary Care Collaborative; 2007 [Available from:  
10 [http://www.aafp.org/dam/AAFP/documents/practice\\_management/pcmh/initiatives/PC](http://www.aafp.org/dam/AAFP/documents/practice_management/pcmh/initiatives/PC)  
11 [MHJoint.pdf](http://www.aafp.org/dam/AAFP/documents/practice_management/pcmh/initiatives/PC).  
12  
13
- 14  
15 7. The College of Family Physicians of Canada. *Family Practice: The Patient’s Medical*  
16 *Home*. September 2011.  
17  
18
- 19  
20 8. Hutchison B, Glazier R. Ontario's primary care reforms have transformed the local care  
21 landscape, but a plan is needed for ongoing improvement. *Health Affairs*. 2013;32(4):695-703.  
22
- 23  
24 9. Gosden T, Forland F, Kristiansen IS, Sutton M, Leese B, Giuffrida A, et al. Capitation,  
25 salary, fee-for-service and mixed systems of payment: effects on the behaviour of primary care  
26 physicians. *Cochrane database syst rev*. 2000;3(3):CD002215.  
27  
28
- 29  
30 10. Bodenheimer T, Ghorob A, Willard-Grace R, Grumbach K. The 10 building blocks of high-  
31 performing primary care. *The Annals of Family Medicine*. 2014;12(2):166-71.  
32  
33
- 34  
35 11. McCarthy D, Mueller K, Tillmann I, Fund C. *Group Health Cooperative: reinventing*  
36 *primary care by connecting patients with a medical home: Commonwealth Fund; 2009*.  
37
- 38  
39 12. Sinsky CA, Willard-Grace R, Schutzbank AM, Sinsky TA, Margolius D, Bodenheimer T. In  
40 search of joy in practice: a report of 23 high-functioning primary care practices. *The Annals of*  
41 *Family Medicine*. 2013;11(3):272-8.  
42  
43
- 44  
45 13. Kiran T, Kopp A, Glazier RH. Those Left Behind From Voluntary Medical Home Reforms in  
46 Ontario, Canada. *The Annals of Family Medicine*. 2016;14(6):517-25.  
47
- 48  
49 14. Green ME GP, Frymire E, Glazier RH. *Geographic Variation in the Supply and Distribution*  
50 *of Comprehensive Primary Care Physicians in Ontario, 2014/15*. Toronto, Ontario: ICES; 2017.  
51
- 52  
53 15. Kralj B. *Measuring Rurality - RIO2008\_BASIC: Methodology and Results* Toronto: Ontario  
54 *Medical Association 2009*.  
55  
56  
57  
58  
59  
60

16. Ferguson R. Ontario wants more patients to get same-day or next-day appointments, Ontario health minister says. Toronto Star. February 3, 2015.
17. Grant K. How quickly can you see a doctor? Study shows Canada lags behind other nations on timely access. The Globe and Mail. February 16, 2017.
18. Henry DA, Schultz SE, Glazier RH, Bhatia RS, Dhalla IA, Laupacis A. Payments to Ontario Physicians from Ministry of Health and Long-Term Care Sources, 1992/93 to 2009/10. ICES Investigative Report. Toronto: Institute for Clinical Evaluative Sciences; 2012.
19. Goodson JD, Bierman AS, Fein O, Rask K, Rich EC, Selker HP. The future of capitation the physician role in managing change in practice. Journal of general internal medicine. 2001;16(4):250-6.
20. Ghorob A, Bodenheimer T. Sharing the care to improve access to primary care. New England Journal of Medicine. 2012;366(21):1955-7.
21. Kiran T. Communicating with patients like it's 2018 February 6, 2018 [Available from: <https://www.winnipegfreepress.com/opinion/analysis/communicating-with-patients-like-its-2018-472875753.html>].
22. Kiran T. Communicating with patients like it's 2018. Winnipeg Free Press. June 2, 2018.
23. FHT Funding Agreement: Frequently Asked Questions 2018 [Available from: <https://www.oma.org/wp-content/uploads/FAQs-FHTFundingAgreement.pdf>].

**Table 1.** Association between respondent demographics and self-report of favourable access to primary care as measured by four questions on the provincial Health Care Experience Survey

|                                    | Same/next day<br>access when sick<br>(N=16,602) | P-<br>value | Satisfaction with time<br>to visit when sick<br>(N=2,364) | P-<br>value | Telephone<br>Access<br>(N=18,179) | P-<br>value | Awareness of<br>after-hours clinic<br>(N=33,660) | P-<br>value |
|------------------------------------|-------------------------------------------------|-------------|-----------------------------------------------------------|-------------|-----------------------------------|-------------|--------------------------------------------------|-------------|
|                                    | N (%)                                           |             | N (%)                                                     |             | N (%)                             |             | N (%)                                            |             |
| <b>All respondents</b>             | 6684 (40.3%)                                    |             | 1652 (69.9%)                                              |             | 14223 (78.2%)                     |             | 13858 (41.2%)                                    |             |
| <b>Sex</b>                         |                                                 | 0.909       |                                                           | 0.101       |                                   | 0.281       |                                                  | <.001       |
| Female                             | 4,135 (40.3%)                                   |             | 980 (68.6%)                                               |             | 9,021 (78.0%)                     |             | 8,731 (44.7%)                                    |             |
| Male                               | 2,549 (40.2%)                                   |             | 672 (71.8%)                                               |             | 5,202 (78.7%)                     |             | 5,127 (36.3%)                                    |             |
| <b>Age</b>                         |                                                 | <.001       |                                                           | <.001       |                                   | <.001       |                                                  | <.001       |
| 16-49                              | 2,867 (39.5%)                                   |             | 615 (65.6%)                                               |             | 5,924 (76.5%)                     |             | 5,644 (39.5%)                                    |             |
| 50-64                              | 2,068 (38.4%)                                   |             | 533 (68.2%)                                               |             | 4,596 (77.4%)                     |             | 4,500 (43.2%)                                    |             |
| 65-79                              | 1,426 (43.7%)                                   |             | 414 (77.5%)                                               |             | 3,072 (83.1%)                     |             | 3,028 (42.5%)                                    |             |
| 80+                                | 323 (46.9%)                                     |             | 90 (80.4%)                                                |             | 631 (78.7%)                       |             | 686 (37.4%)                                      |             |
| <b>Rurality</b>                    |                                                 | <.001       |                                                           | 0.057       |                                   | 0.022       |                                                  | <.001       |
| Big cities                         | 4,417 (43.1%)                                   |             | 1,027 (71.3%)                                             |             | 8,123 (78.8%)                     |             | 8,889 (44.9%)                                    |             |
| Small towns                        | 1,685 (38.8%)                                   |             | 440 (69.6%)                                               |             | 4,255 (78.2%)                     |             | 3,868 (41.8%)                                    |             |
| Rural                              | 505 (28.9%)                                     |             | 162 (63.8%)                                               |             | 1,624 (76.2%)                     |             | 974 (24.3%)                                      |             |
| Missing                            | 77 (28.4%)                                      |             | 23 (60.5%)                                                |             | 221 (74.2%)                       |             | 127 (22.0%)                                      |             |
| <b>Recent registrant</b>           |                                                 | <.001       |                                                           | 0.03        |                                   | 0.004       |                                                  | <.001       |
| No                                 | 6,427 (40.0%)                                   |             |                                                           |             |                                   |             |                                                  |             |
| Yes                                | 257 (49.0%)                                     |             | 42 (58.3%)                                                |             | 311 (72.5%)                       |             | 281 (26.6%)                                      |             |
| <b>Aggregated diagnosis groups</b> |                                                 | <.001       |                                                           | 0.261       |                                   | 0.075       |                                                  | <.001       |
| 0 (lowest)                         | 98 (37.5%)                                      |             | 25 (69.4%)                                                |             | 312 (80.2%)                       |             | 483 (34.3%)                                      |             |
| 1-5                                | 2,219 (38.2%)                                   |             | 564 (70.4%)                                               |             | 5,467 (79.0%)                     |             | 5,753 (40.2%)                                    |             |
| 6-9                                | 3,305 (40.5%)                                   |             | 806 (68.4%)                                               |             | 6,592 (77.4%)                     |             | 6,056 (42.4%)                                    |             |
| 10+ (highest)                      | 1,062 (44.8%)                                   |             | 257 (73.9%)                                               |             | 1,852 (78.6%)                     |             | 1,566 (42.8%)                                    |             |

1  
2  
3  
4  
5  
6  
7  
8  
9  
10  
11  
12  
13  
14  
15  
16  
17  
18  
19  
20  
21  
22  
23  
24  
25  
26  
27  
28  
29  
30  
31  
32  
33  
34  
35  
36  
37  
38  
39  
40  
41  
42  
43  
44  
45  
46  
47

|                                   |               |       |               |       |                |       |                |       |
|-----------------------------------|---------------|-------|---------------|-------|----------------|-------|----------------|-------|
| <b>Resource Utilization Bands</b> |               | 0.041 |               | 0.17  |                | 0.168 |                | <.001 |
| 0 (lowest)                        | 96 (37.5%)    |       | 24 (70.6%)    |       | 304 (80.0%)    |       | 477 (34.4%)    |       |
| 1                                 | 196 (41.4%)   |       | 40 (66.7%)    |       | 499 (81.7%)    |       | 546 (37.8%)    |       |
| 2                                 | 770 (39.1%)   |       | 199 (69.3%)   |       | 1,856 (78.4%)  |       | 2,010 (39.2%)  |       |
| 3                                 | 3,788 (39.6%) |       | 934 (69.2%)   |       | 7,827 (77.7%)  |       | 7,616 (42.0%)  |       |
| 4                                 | 1,305 (42.1%) |       | 296 (68.8%)   |       | 2,693 (78.4%)  |       | 2,320 (42.3%)  |       |
| 5                                 | 529 (42.8%)   |       | 159 (78.3%)   |       | 1,044 (79.5%)  |       | 889 (42.5%)    |       |
| <b>Self-reported health</b>       |               | <.001 |               | <.001 |                | <.001 |                | <.001 |
| Excellent                         | 1,134 (43.7%) |       | 228 (74.3%)   |       | 2,557 (81.3%)  |       | 2,628 (42.1%)  |       |
| Very good                         | 2,465 (40.9%) |       | 598 (72.3%)   |       | 5,392 (80.5%)  |       | 5,383 (42.8%)  |       |
| Good                              | 1,934 (39.2%) |       | 521 (69.4%)   |       | 3,942 (76.5%)  |       | 3,789 (39.7%)  |       |
| Fair                              | 778 (36.6%)   |       | 209 (61.1%)   |       | 1,673 (74.5%)  |       | 1,487 (39.3%)  |       |
| Poor                              | 351 (40.6%)   |       | 88 (68.2%)    |       | 617 (70.7%)    |       | 528 (38.2%)    |       |
| Missing                           | 22 (40.7%)    |       | 8 (100.0%)    |       | 42 (68.9%)     |       | 43 (35.2%)     |       |
| <b>Education</b>                  |               | 0.544 |               | 0.003 |                | 0.005 |                | <.001 |
| Less than high School             | 666 (40.9%)   |       | 143 (67.8%)   |       | 1,223 (76.8%)  |       | 1,362 (35.0%)  |       |
| High School                       | 1,336 (40.9%) |       | 346 (73.0%)   |       | 2,880 (80.4%)  |       | 2,798 (39.3%)  |       |
| Some college or university        | 622 (41.2%)   |       | 175 (81.0%)   |       | 1,331 (80.0%)  |       | 1,266 (41.6%)  |       |
| College or Trade                  | 1,719 (39.9%) |       | 385 (68.0%)   |       | 3,788 (77.5%)  |       | 3,666 (43.6%)  |       |
| Bachelor's degree                 | 1,525 (39.6%) |       | 396 (67.2%)   |       | 3,306 (77.7%)  |       | 3,117 (42.4%)  |       |
| Graduate or professional degree   | 762 (39.6%)   |       | 189 (66.8%)   |       | 1,604 (77.0%)  |       | 1,555 (43.3%)  |       |
| Missing                           | 54 (47.4%)    |       | 18 (72.0%)    |       | 91 (77.8%)     |       | 94 (38.1%)     |       |
| <b>Financial situation</b>        |               | 0.001 |               | <.001 |                | <.001 |                | <.001 |
| Very comfortable                  | 1,077 (43.3%) |       | 266 (75.8%)   |       | 2,365 (81.8%)  |       | 2,230 (43.1%)  |       |
| Comfortable                       | 3,978 (40.1%) |       | 1,005 (71.2%) |       | 8,620 (79.0%)  |       | 8,590 (41.9%)  |       |
| Tight                             | 1,444 (38.4%) |       | 339 (63.0%)   |       | 2,897 (73.6%)  |       | 2,686 (37.9%)  |       |
| Missing                           | 185 (42.2%)   |       | 42 (66.7%)    |       | 341 (77.1%)    |       | 352 (39.9%)    |       |
| <b>Language</b>                   |               | 0.026 |               | 0.041 |                | <.001 |                | <.001 |
| English                           | 5,890 (39.9%) |       | 1,494 (70.6%) |       | 13,153 (78.7%) |       | 12,794 (42.6%) |       |
| Other                             | 780 (43.0%)   |       | 156 (64.2%)   |       | 1,054 (72.9%)  |       | 1,051 (29.4%)  |       |
| Missing                           | 14 (48.3%)    |       | <=5 (40.0%)   |       | 16 (80.0%)     |       | 13 (22.8%)     |       |

**Table 2.** Crude number and proportion of survey respondents reporting favourable access stratified by physician practice model and rurality

|                                                      |                    | All respondents<br>N (%) | Team-<br>capitation<br>N (%) | Non-team<br>capitation<br>N (%) | Enhanced fee-<br>for-service<br>N (%) | Not rostered<br>N (%) | P-value |
|------------------------------------------------------|--------------------|--------------------------|------------------------------|---------------------------------|---------------------------------------|-----------------------|---------|
| <b>Same/next day access<br/>when sick</b>            | <b>Overall</b>     | 6493 (40.9%)             | 2147 (38.5%)                 | 1711 (38.8%)                    | 1868 (45.1%)                          | 767 (43.4%)           | <0.0001 |
|                                                      | <b>Big cities</b>  | 4406 (43.2%)             | 1074 (42.5%)                 | 1249 (39.8%)                    | 1505 (45.7%)                          | 578 (46.1%)           | <0.0001 |
|                                                      | <b>Small towns</b> | 1605 (40%)               | 795 (40.1%)                  | 377 (36.9%)                     | 310 (44.9%)                           | 123 (39%)             | <0.0001 |
|                                                      | <b>Rural</b>       | 482 (28.8%)              | 278 (26.2%)                  | 85 (33.5%)                      | 53 (33.1%)                            | 66 (33.3%)            | 0.04    |
| <b>Satisfaction with time<br/>to visit when sick</b> | <b>Overall</b>     | 1576 (70.1%)             | 554 (69.9%)                  | 470 (69.4%)                     | 372 (70.1%)                           | 180 (72.9%)           | 0.87    |
|                                                      | <b>Big cities</b>  | 1023 (71.2%)             | 270 (73.8%)                  | 331 (69.5%)                     | 296 (69.8%)                           | 126 (74.1%)           | 0.33    |
|                                                      | <b>Small towns</b> | 400 (69.8%)              | 194 (69.8%)                  | 110 (67.9%)                     | 63 (74.1%)                            | 33 (68.8%)            | 0.88    |
|                                                      | <b>Rural</b>       | 153 (64%)                | 90 (60.4%)                   | 29 (74.4%)                      | 13 (59.1%)                            | 21 (72.4%)            | 0.42    |
| <b>Telephone Access</b>                              | <b>Overall</b>     | 13571 (78.5%)            | 5239 (78.5%)                 | 4004 (79.4%)                    | 2964 (78.3%)                          | 1364 (76.5%)          | 0.0001  |
|                                                      | <b>Big cities</b>  | 8100 (78.8%)             | 2283 (80.8%)                 | 2730 (79.2%)                    | 2201 (77.3%)                          | 886 (76.2%)           | 0.003   |
|                                                      | <b>Small towns</b> | 3919 (79%)               | 1982 (78.2%)                 | 997 (79.6%)                     | 627 (81.9%)                           | 313 (76.9%)           | <0.0001 |
|                                                      | <b>Rural</b>       | 1552 (76.2%)             | 974 (74.2%)                  | 277 (81.2%)                     | 136 (79.5%)                           | 165 (77.5%)           | 0.07    |
| <b>Awareness of after-<br/>hours clinic</b>          | <b>Overall</b>     | 13528 (42.2%)            | 5492 (48.1%)                 | 4213 (47.4%)                    | 2710 (34.3%)                          | 1113 (29.1%)          | <0.0001 |
|                                                      | <b>Big cities</b>  | 8880 (44.9%)             | 2832 (58.7%)                 | 3146 (51%)                      | 2125 (34.4%)                          | 777 (30%)             | <0.0001 |
|                                                      | <b>Small towns</b> | 3701 (43.8%)             | 2061 (49.5%)                 | 900 (42.5%)                     | 507 (36.6%)                           | 233 (29.8%)           | <0.0001 |
|                                                      | <b>Rural</b>       | 947 (24.7%)              | 599 (24.6%)                  | 167 (27.9%)                     | 78 (22.9%)                            | 103 (22.3%)           | 0.008   |

\*Table excludes respondents with rurality variable missing

Figure 1: Survey respondents included in study

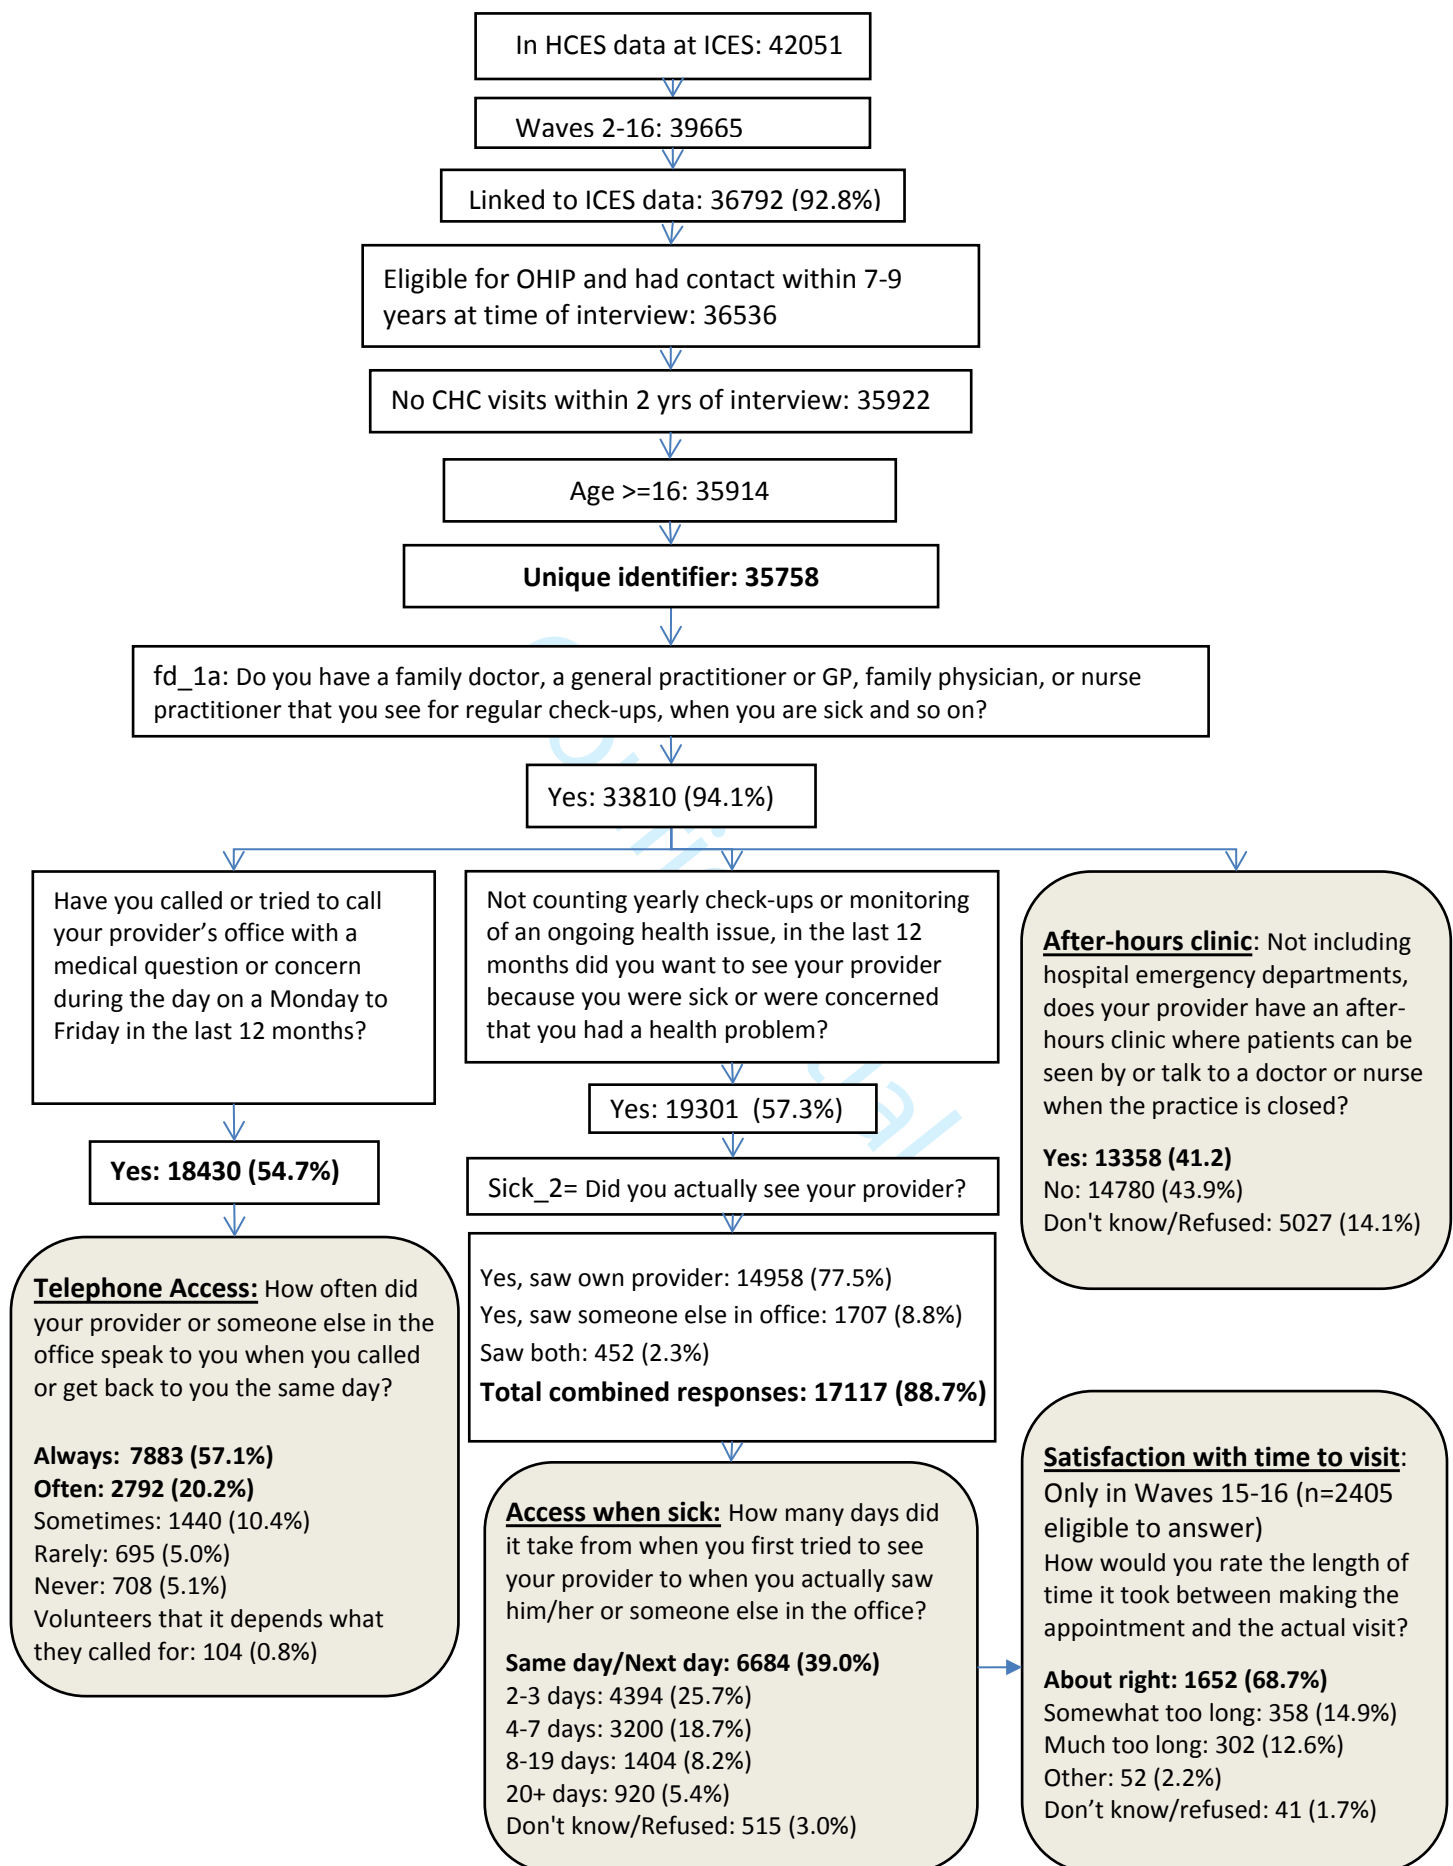

Figure 2. Percentage of respondents in wave 15-16 reporting favourable access for all four questions

a. Stratified by practice model, n=1486

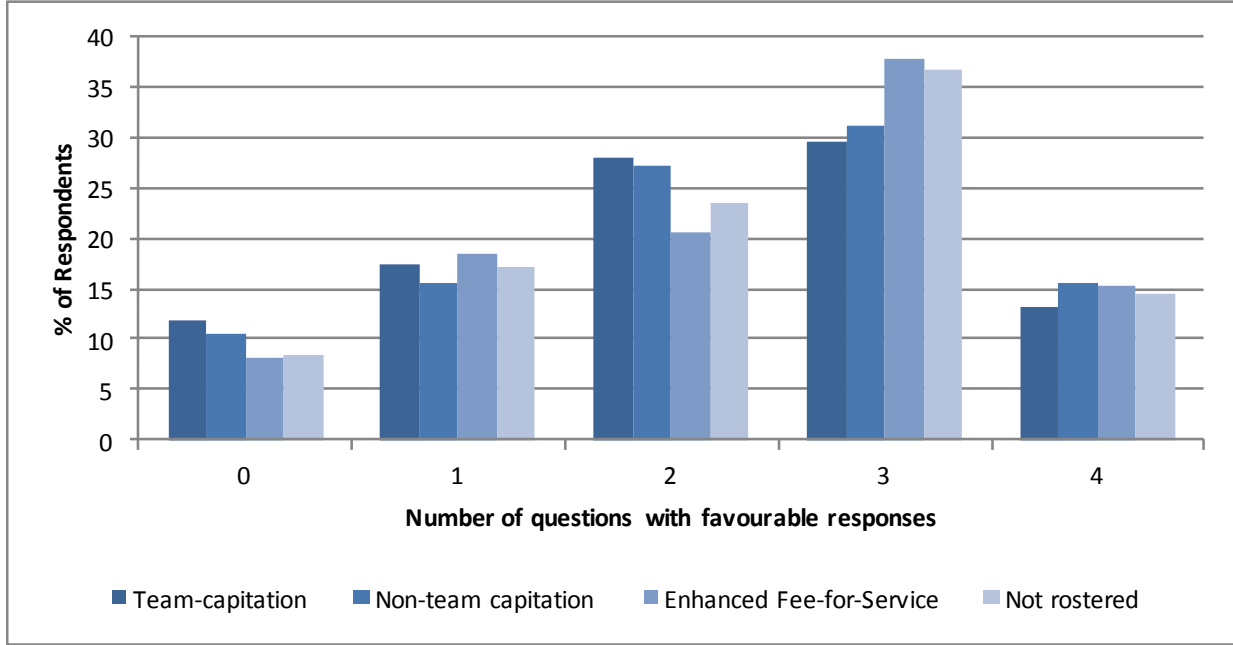

b. Stratified by rurality, n=1540

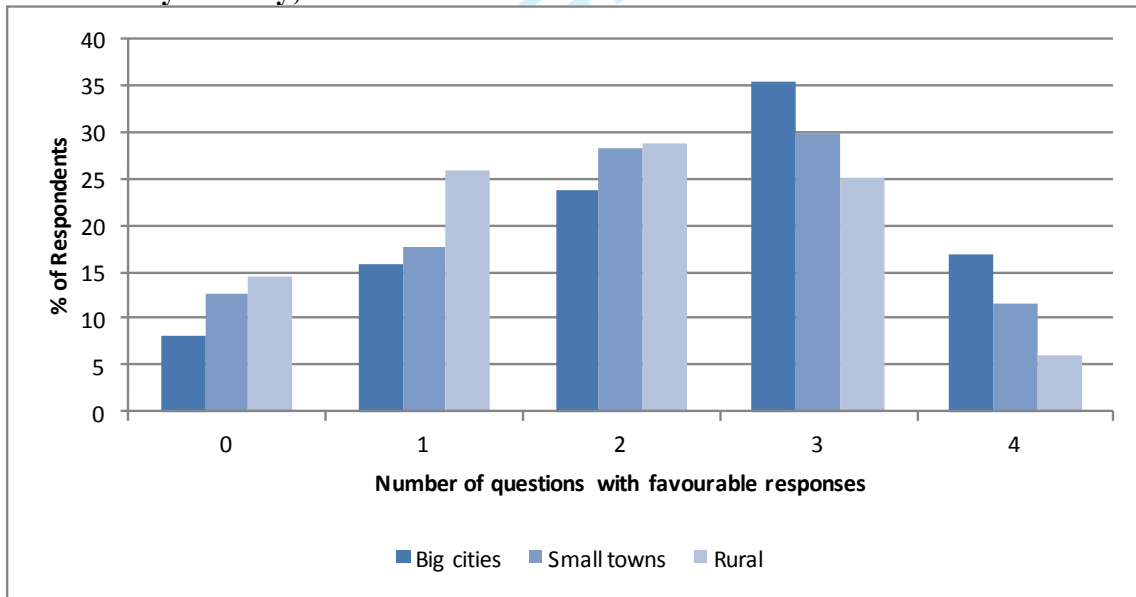

Figure 3. Relationship between same/next day visit and satisfaction with time to visit when sick (N=2294)

1  
2  
3  
4  
5  
6  
7  
8  
9  
10  
11  
12  
13  
14  
15  
16  
17  
18  
19  
20  
21  
22  
23  
24  
25  
26  
27  
28  
29  
30  
31  
32  
33  
34  
35  
36  
37  
38  
39  
40  
41  
42  
43  
44  
45  
46  
47  
48  
49  
50  
51  
52  
53  
54  
55  
56  
57  
58  
59  
60

### Overlap in Ontarians reporting a same/next day appointment and those satisfied with time to visit when sick

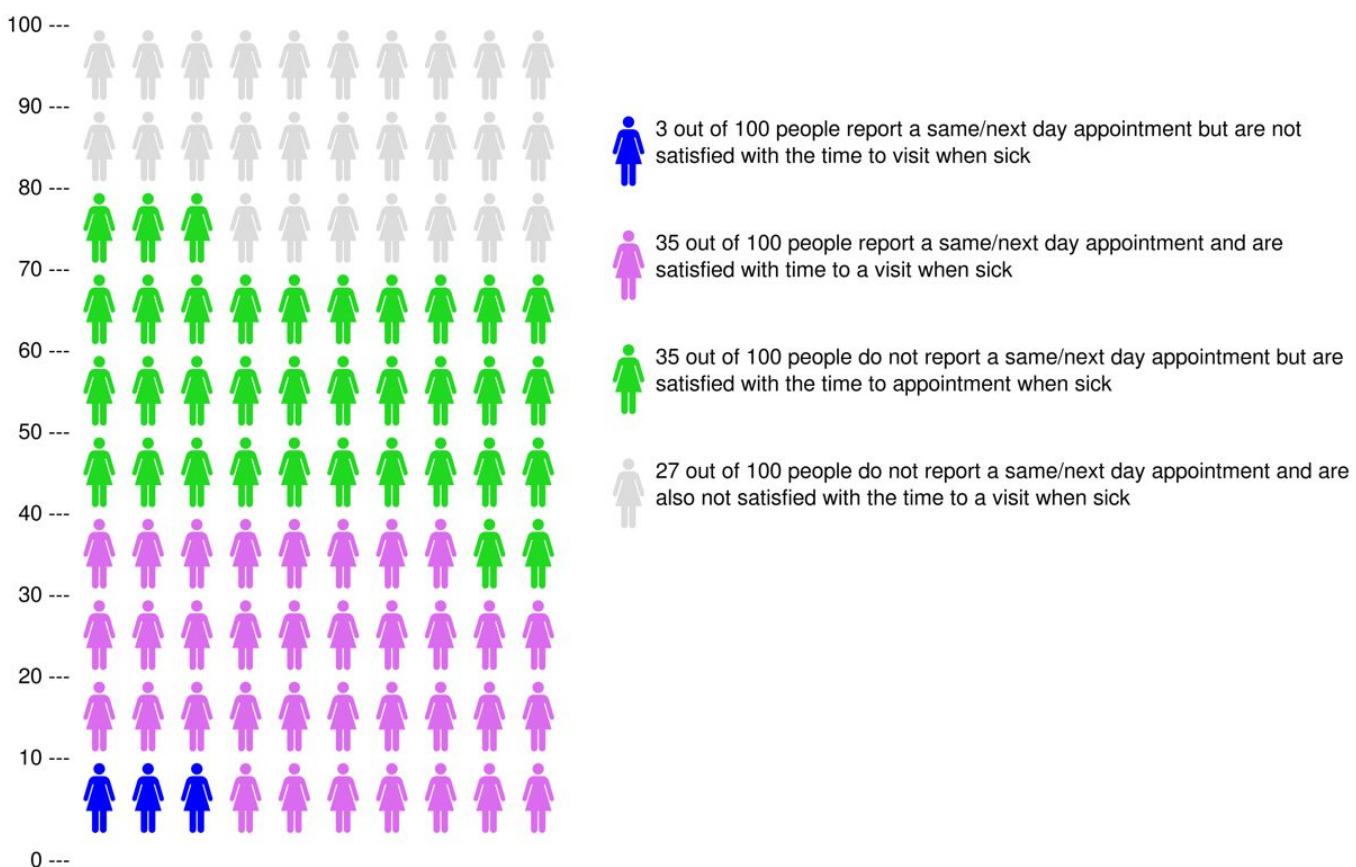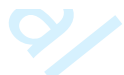



Fig 4. Adjusted\* odds of patients in different practice models reporting favourable access, stratified by rurality

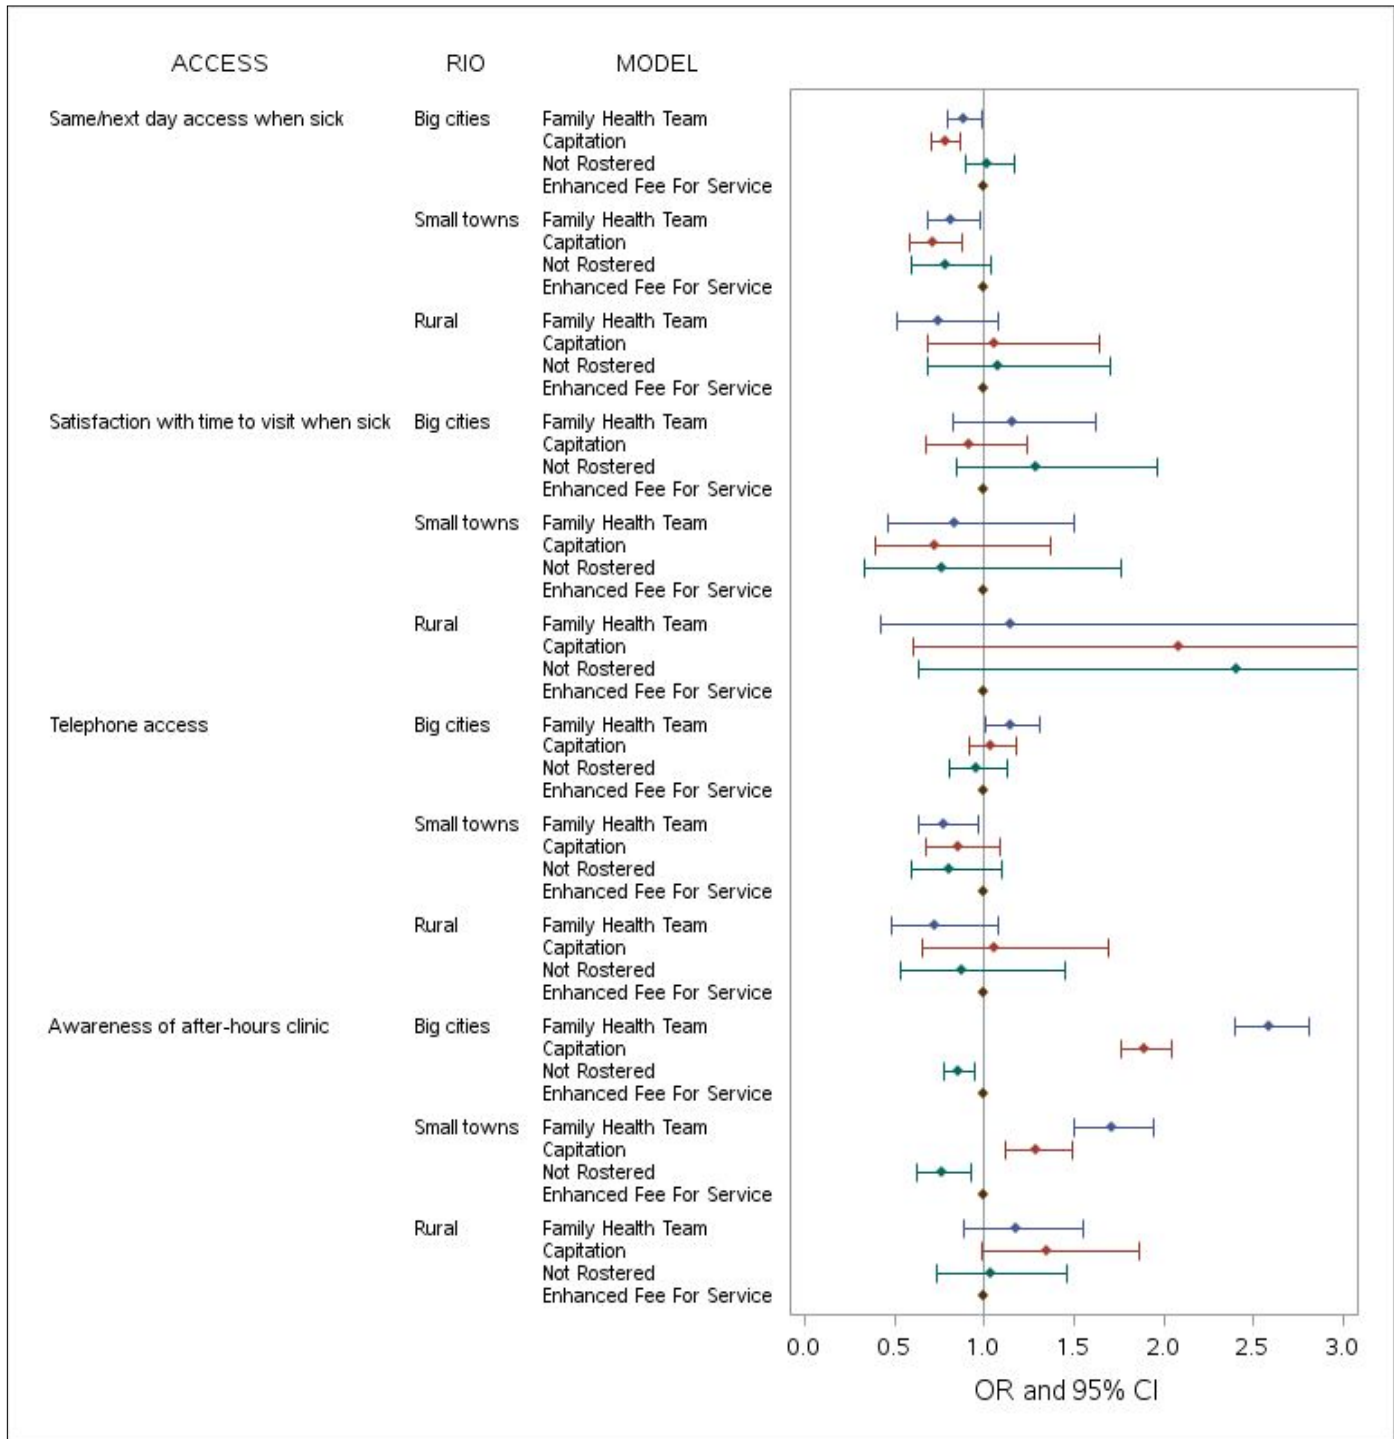

\*all models adjusted for age, sex, education, tight financial situation, self-rated health, co-morbidity and recent registration. Full parameter estimates presented in the appendix

1  
2  
3  
4  
5  
6  
7  
8  
9  
10  
11  
12  
13  
14  
15  
16  
17  
18  
19  
20  
21  
22  
23  
24  
25  
26  
27  
28  
29  
30  
31  
32  
33  
34  
35  
36  
37  
38  
39  
40  
41  
42  
43  
44  
45  
46  
47  
48  
49  
50  
51  
52  
53  
54  
55  
56  
57  
58  
59  
60

**Supplementary material**

**eExhibit1. Demographic characteristics of survey respondents compared to Ontario’s general population**

**eExhibit2. Full parameter estimates for regression models**

Confidential

**eExhibit 1. Demographic characteristics of survey respondents and the general Ontario population**

|                                       |               | Ontario population* not included as Health Care Experience Survey respondents in administrative database (N= 13,567,530) | Ontario population* who responded to the Health Care Experience Survey and agreed to link responses to health administrative databases (N= 36,792) | P-VALUE |
|---------------------------------------|---------------|--------------------------------------------------------------------------------------------------------------------------|----------------------------------------------------------------------------------------------------------------------------------------------------|---------|
| Number of Aggregated Diagnosis Groups | 0             | 1,369,910 (10.1%)                                                                                                        | 1,938 (5.3%)                                                                                                                                       | <.001   |
|                                       | 1-5           | 6,425,531 (47.4%)                                                                                                        | 15,928 (43.8%)                                                                                                                                     |         |
|                                       | 6-9           | 4,751,400 (35.0%)                                                                                                        | 14,890 (40.9%)                                                                                                                                     |         |
|                                       | 10+           | 1,020,689 (7.5%)                                                                                                         | 3,635 (10.0%)                                                                                                                                      |         |
| Resource Utilization Band             | 0 (low)       | 1,367,315 (10.1%)                                                                                                        | 1,921 (5.3%)                                                                                                                                       | <.001   |
|                                       | 1             | 921,199 (6.8%)                                                                                                           | 1,708 (4.7%)                                                                                                                                       |         |
|                                       | 2             | 2,844,739 (21.0%)                                                                                                        | 5,902 (16.2%)                                                                                                                                      |         |
|                                       | 3             | 6,289,381 (46.4%)                                                                                                        | 19,131 (52.6%)                                                                                                                                     |         |
|                                       | 4             | 1,609,006 (11.9%)                                                                                                        | 5,697 (15.7%)                                                                                                                                      |         |
|                                       | 5 (high)      | 535,890 (3.9%)                                                                                                           | 2,032 (5.6%)                                                                                                                                       |         |
| Age                                   | Mean (95% CI) | 39.9 (39.9, 39.9)                                                                                                        | 51.5 (51.3, 51.7)                                                                                                                                  | <.001   |
|                                       | Median (IQR)  | 40 (21-57)                                                                                                               | 52 (39-64)                                                                                                                                         | <.001   |
| Neighbourhood income quintile         | 1 (low)       | 2,550,378 (18.9%)                                                                                                        | 6,068 (16.7%)                                                                                                                                      | <.001   |
|                                       | 2             | 2,618,355 (19.4%)                                                                                                        | 6,812 (18.8%)                                                                                                                                      |         |
|                                       | 3             | 2,709,490 (20.1%)                                                                                                        | 7,279 (20.1%)                                                                                                                                      |         |
|                                       | 4             | 2,892,611 (21.4%)                                                                                                        | 7,938 (21.9%)                                                                                                                                      |         |
|                                       | 5 (high)      | 2,741,411 (20.3%)                                                                                                        | 8,147 (22.5%)                                                                                                                                      |         |
| Recent registrant                     | No            | 10,722,933 (89.8%)                                                                                                       | 34,219 (94.0%)                                                                                                                                     | <.001   |
|                                       | Yes           | 1,215,977 (10.2%)                                                                                                        | 2,171 (6.0%)                                                                                                                                       |         |
| Rurality                              | Urban         | 9,883,419 (73.5%)                                                                                                        | 21,394 (59.9%)                                                                                                                                     | <.001   |
|                                       | Small town    | 2,588,048 (19.2%)                                                                                                        | 9,822 (27.5%)                                                                                                                                      |         |
|                                       | Rural         | 984,250 (7.3%)                                                                                                           | 4,515 (12.6%)                                                                                                                                      |         |
| Sex from RPDB                         | F             | 6,919,094 (51.0%)                                                                                                        | 20,826 (57.2%)                                                                                                                                     | <.001   |
|                                       | M             | 6,648,436 (49.0%)                                                                                                        | 15,565 (42.8%)                                                                                                                                     |         |

\*Ontario population includes all Ontario residents with a valid the Ontario Health Insurance Plan, who were alive at the index date, and had contacts with the healthcare system in the last 7 to 9 years.

## eExhibit 2. Full Parameter Estimates for Regression Models

### a. Same/next day access when sick

| Variables                         | Labels                          | Odds Ratio (95% CI) |                     |                      |
|-----------------------------------|---------------------------------|---------------------|---------------------|----------------------|
|                                   |                                 | Big cities          | Small towns         | Rural                |
| Age                               | Years                           | 1.01 (1.003, 1.008) | 1.00 (1.000, 1.009) | 1.00 (0.995, 1.010)  |
| Aggregated diagnosis groups (ADG) | Medium (6-9)                    | 1.07 (0.980, 1.177) | 1.06 (0.918, 1.226) | 1.03 (0.812, 1.315)  |
|                                   | High (10+)                      | 1.26 (1.102, 1.438) | 1.17 (0.943, 1.460) | 1.45 (0.992, 2.114)  |
|                                   | Low (0-5) - ref                 | 1.00                | 1.00                | 1.00                 |
| Education                         | Less than high School           | 1.30 (1.082, 1.559) | 1.35 (0.993, 1.838) | 1.37 (0.787, 2.402)  |
|                                   | High School                     | 1.27 (1.095, 1.465) | 1.18 (0.892, 1.551) | 1.38 (0.815, 2.349)  |
|                                   | Some college or university      | 1.27 (1.065, 1.505) | 1.25 (0.905, 1.717) | 1.28 (0.709, 2.293)  |
|                                   | College or Trade                | 1.18 (1.027, 1.348) | 1.14 (0.872, 1.490) | 1.37 (0.809, 2.305)  |
|                                   | Bachelor's degree               | 1.06 (0.932, 1.212) | 1.03 (0.776, 1.369) | 1.07 (0.616, 1.865)  |
|                                   | Graduate/professional – ref     | 1.00                | 1.00                | 1.00                 |
| Financial situation               | Very comfortable                | 1.22 (1.059, 1.400) | 1.17 (0.935, 1.458) | 1.28 (0.871, 1.889)  |
|                                   | Comfortable                     | 1.02 (0.923, 1.132) | 1.11 (0.938, 1.308) | 1.33 (1.001, 1.762)  |
|                                   | Tight - ref                     | 1.00                | 1.00                | 1.00                 |
| Recent immigrant                  | No                              | 0.70 (0.581, 0.852) | 0.94 (0.379, 2.327) | 1.09 (0.108, 10.905) |
|                                   | Yes - ref                       | 1.00                | 1.00                | 1.00                 |
| Models of care                    | Family Health Team              | 0.88 (0.791, 0.983) | 0.82 (0.681, 0.976) | 0.74 (0.514, 1.078)  |
|                                   | Capitation                      | 0.78 (0.704, 0.865) | 0.71 (0.581, 0.871) | 1.06 (0.688, 1.637)  |
|                                   | Not Rostered                    | 1.02 (0.893, 1.168) | 0.78 (0.592, 1.032) | 1.08 (0.683, 1.706)  |
|                                   | Enhanced Fee For Services - ref | 1.00                | 1.00                | 1.00                 |
| Self-reported health              | Very good                       | 0.94 (0.834, 1.059) | 0.79 (0.651, 0.960) | 0.76 (0.538, 1.071)  |
|                                   | Good                            | 0.81 (0.716, 0.924) | 0.77 (0.626, 0.950) | 0.82 (0.574, 1.172)  |
|                                   | Fair                            | 0.69 (0.586, 0.808) | 0.72 (0.556, 0.924) | 0.72 (0.469, 1.113)  |
|                                   | Poor                            | 0.81 (0.649, 1.005) | 0.64 (0.454, 0.902) | 0.84 (0.477, 1.482)  |
|                                   | Excellent - ref                 | 1.00                | 1.00                | 1.00                 |
| Sex                               | Female                          | 1.02 (0.937, 1.107) | 0.96 (0.836, 1.097) | 0.88 (0.705, 1.104)  |
|                                   | Male - ref                      | 1.00                | 1.00                | 1.00                 |

## b. Satisfaction with time to visit when sick

| Variables                                | Labels                          | Odds Ratio (95% CI) |                     |                     |
|------------------------------------------|---------------------------------|---------------------|---------------------|---------------------|
|                                          |                                 | Big cities          | Small towns         | Rural               |
| <b>Age</b>                               | Years                           | 1.01 (1.003, 1.019) | 1.02 (1.003, 1.029) | 1.01 (0.984, 1.027) |
| <b>Aggregated diagnosis groups (ADG)</b> | Medium (6-9)                    | 0.76 (0.578, 1.008) | 1.22 (0.796, 1.860) | 0.84 (0.428, 1.638) |
|                                          | High (10+)                      | 1.08 (0.718, 1.634) | 1.66 (0.852, 3.217) | 1.55 (0.528, 4.542) |
|                                          | Low (0-5) - ref                 | 1.00                | 1.00                | 1.00                |
| <b>Education</b>                         | Less than high School           | 1.59 (0.873, 2.898) | 2.01 (0.833, 4.833) | 0.32 (0.066, 1.527) |
|                                          | High School                     | 1.71 (1.100, 2.647) | 2.11 (0.987, 4.518) | 0.80 (0.174, 3.658) |
|                                          | Some college or university      | 2.31 (1.318, 4.045) | 3.53 (1.357, 9.164) | 1.39 (0.233, 8.347) |
|                                          | College or Trade                | 1.18 (0.794, 1.768) | 1.99 (0.942, 4.209) | 0.31 (0.071, 1.328) |
|                                          | Bachelor's degree               | 0.99 (0.682, 1.439) | 1.71 (0.789, 3.696) | 0.31 (0.069, 1.356) |
|                                          | Graduate/professional – ref     | 1.00                | 1.00                | 1.00                |
| <b>Financial situation</b>               | Very comfortable                | 2.29 (1.480, 3.548) | 0.89 (0.454, 1.733) | 2.65 (0.890, 7.901) |
|                                          | Comfortable                     | 1.43 (1.064, 1.926) | 1.27 (0.802, 2.025) | 1.89 (0.902, 3.949) |
|                                          | Tight - ref                     | 1.00                | 1.00                | 1.00                |
| <b>Recent immigrant</b>                  | No                              | 1.49 (0.858, 2.601) | 0.00 (--, --)       | 1.15 (0.419, 3.161) |
|                                          | Yes - ref                       | 1.00                | 1.00                | 1.00                |
| <b>Models of care</b>                    | Family Health Team              | 1.16 (0.825, 1.620) | 0.84 (0.468, 1.500) | 2.08 (0.605, 7.179) |
|                                          | Capitation                      | 0.91 (0.672, 1.239) | 0.73 (0.388, 1.368) | 2.40 (0.637, 9.080) |
|                                          | Not Rostered                    | 1.28 (0.841, 1.960) | 0.77 (0.336, 1.766) | 0.47 (0.165, 1.346) |
|                                          | Enhanced Fee For Services - ref | 1.00                | 1.00                | 1.00                |
| <b>Self-reported health</b>              | Very good                       | 1.02 (0.682, 1.518) | 0.79 (0.419, 1.471) | 0.77 (0.253, 2.343) |
|                                          | Good                            | 0.82 (0.545, 1.232) | 0.70 (0.363, 1.367) | 0.48 (0.129, 1.756) |
|                                          | Fair                            | 0.51 (0.314, 0.824) | 0.34 (0.164, 0.722) | 0.18 (0.034, 0.930) |
|                                          | Poor                            | 1.26 (0.614, 2.604) | 0.52 (0.196, 1.393) | 1.07 (0.583, 1.976) |
|                                          | Excellent - ref                 | 1.00                | 1.00                | 1.00                |
| <b>Sex</b>                               | Female                          | 0.86 (0.665, 1.100) | 0.87 (0.589, 1.293) | 1.01 (0.984, 1.027) |
|                                          | Male - ref                      | 1.00                | 1.00                | 1.00                |

## c. Telephone Access

| Variables                                | Labels                          | Odds Ratio (95% CI) |                     |                     |
|------------------------------------------|---------------------------------|---------------------|---------------------|---------------------|
|                                          |                                 | Big cities          | Small towns         | Rural               |
| <b>Age</b>                               | Years                           | 1.01 (1.006, 1.013) | 1.01 (1.007, 1.016) | 1.00 (0.994, 1.008) |
| <b>Aggregated diagnosis groups (ADG)</b> | Medium (6-9)                    | 0.87 (0.779, 0.971) | 1.08 (0.926, 1.264) | 0.86 (0.686, 1.084) |
|                                          | High (10+)                      | 1.01 (0.854, 1.190) | 1.06 (0.829, 1.357) | 0.97 (0.654, 1.441) |
|                                          | Low (0-5) - ref                 | 1.00                | 1.00                | 1.00                |
| <b>Education</b>                         | Less than high School           | 1.03 (0.816, 1.293) | 1.40 (1.004, 1.957) | 1.45 (0.895, 2.358) |
|                                          | High School                     | 1.34 (1.119, 1.606) | 1.52 (1.142, 2.025) | 1.73 (1.109, 2.714) |
|                                          | Some college or university      | 1.49 (1.194, 1.861) | 1.29 (0.929, 1.798) | 1.60 (0.951, 2.690) |
|                                          | College or Trade                | 1.06 (0.899, 1.242) | 1.36 (1.037, 1.791) | 1.37 (0.889, 2.119) |
|                                          | Bachelor's degree               | 1.00 (0.852, 1.163) | 1.33 (0.993, 1.771) | 1.44 (0.906, 2.276) |
|                                          | Graduate/professional – ref     | 1.00                | 1.00                | 1.00                |
| <b>Financial situation</b>               | Very comfortable                | 1.47 (1.237, 1.747) | 1.37 (1.077, 1.742) | 1.34 (0.924, 1.947) |
|                                          | Comfortable                     | 1.20 (1.064, 1.355) | 1.39 (1.167, 1.647) | 1.06 (0.816, 1.374) |
|                                          | Tight - ref                     | 1.00                | 1.00                | 1.00                |
| <b>Recent immigrant</b>                  | No                              | 1.18 (0.931, 1.498) | 1.67 (0.667, 4.170) | 0.91 (0.100, 8.267) |
|                                          | Yes - ref                       | 1.00                | 1.00                | 1.00                |
| <b>Models of care</b>                    | Family Health Team              | 1.15 (1.002, 1.309) | 0.78 (0.630, 0.965) | 0.72 (0.481, 1.076) |
|                                          | Capitation                      | 1.04 (0.915, 1.175) | 0.85 (0.674, 1.083) | 1.05 (0.658, 1.689) |
|                                          | Not Rostered                    | 0.95 (0.806, 1.125) | 0.81 (0.597, 1.094) | 0.88 (0.532, 1.454) |
|                                          | Enhanced Fee For Services - ref | 1.00                | 1.00                | 1.00                |
| <b>Self-reported health</b>              | Very good                       | 0.96 (0.829, 1.112) | 0.96 (0.777, 1.192) | 0.83 (0.591, 1.179) |
|                                          | Good                            | 0.75 (0.639, 0.873) | 0.68 (0.544, 0.854) | 0.63 (0.445, 0.906) |
|                                          | Fair                            | 0.67 (0.550, 0.805) | 0.50 (0.381, 0.653) | 0.69 (0.455, 1.060) |
|                                          | Poor                            | 0.62 (0.477, 0.804) | 0.51 (0.354, 0.722) | 0.49 (0.278, 0.855) |
|                                          | Excellent - ref                 | 1.00                | 1.00                | 1.00                |
| <b>Sex</b>                               | Female                          | 1.05 (0.943, 1.158) | 0.97 (0.831, 1.123) | 0.80 (0.640, 1.002) |
|                                          | Male - ref                      | 1.00                | 1.00                | 1.00                |

## d. Awareness of after-hours clinic

| Variables                                | Labels                          | Odds Ratio (95% CI) |                     |                     |
|------------------------------------------|---------------------------------|---------------------|---------------------|---------------------|
|                                          |                                 | Big cities          | Small towns         | Rural               |
| <b>Age</b>                               | Years                           | 1.01 (1.006, 1.009) | 1.00 (0.996, 1.002) | 1.00 (0.995, 1.005) |
| <b>Aggregated diagnosis groups (ADG)</b> | Medium (6-9)                    | 1.00 (0.932, 1.063) | 1.21 (1.101, 1.339) | 1.19 (1.007, 1.400) |
|                                          | High (10+)                      | 1.04 (0.942, 1.159) | 1.13 (0.963, 1.338) | 1.36 (1.009, 1.822) |
|                                          | Low (0-5) - ref                 | 1.00                | 1.00                | 1.00                |
| <b>Education</b>                         | Less than high School           | 0.75 (0.655, 0.852) | 0.82 (0.667, 1.013) | 0.77 (0.539, 1.112) |
|                                          | High School                     | 0.92 (0.827, 1.025) | 0.91 (0.749, 1.097) | 0.76 (0.539, 1.073) |
|                                          | Some college or university      | 1.02 (0.899, 1.165) | 0.99 (0.792, 1.232) | 0.83 (0.558, 1.223) |
|                                          | College or Trade                | 1.11 (1.003, 1.231) | 0.98 (0.814, 1.184) | 0.96 (0.686, 1.353) |
|                                          | Bachelor's degree               | 1.00 (0.902, 1.099) | 1.01 (0.826, 1.226) | 0.87 (0.608, 1.253) |
|                                          | Graduate/professional – ref     | 1.00                | 1.00                | 1.00                |
| <b>Financial situation</b>               | Very comfortable                | 1.19 (1.073, 1.320) | 1.10 (0.944, 1.287) | 0.89 (0.686, 1.165) |
|                                          | Comfortable                     | 1.12 (1.035, 1.207) | 1.08 (0.965, 1.216) | 1.02 (0.842, 1.237) |
|                                          | Tight - ref                     | 1.00                | 1.00                | 1.00                |
| <b>Recent immigrant</b>                  | No                              | 1.67 (1.431, 1.947) | 1.22 (0.643, 2.312) | 0.85 (0.265, 2.754) |
|                                          | Yes - ref                       | 1.00                | 1.00                | 1.00                |
| <b>Models of care</b>                    | Family Health Team              | 2.59 (2.391, 2.810) | 1.71 (1.503, 1.944) | 1.17 (0.890, 1.550) |
|                                          | Capitation                      | 1.90 (1.758, 2.044) | 1.29 (1.118, 1.488) | 1.35 (0.985, 1.862) |
|                                          | Not Rostered                    | 0.86 (0.772, 0.948) | 0.76 (0.629, 0.925) | 1.03 (0.734, 1.458) |
|                                          | Enhanced Fee For Services - ref | 1.00                | 1.00                | 1.00                |
| <b>Self-reported health</b>              | Very good                       | 1.10 (1.007, 1.191) | 1.01 (0.888, 1.141) | 0.81 (0.653, 1.003) |
|                                          | Good                            | 0.96 (0.881, 1.057) | 0.93 (0.807, 1.063) | 0.80 (0.637, 1.007) |
|                                          | Fair                            | 0.98 (0.866, 1.098) | 0.93 (0.776, 1.107) | 0.61 (0.452, 0.828) |
|                                          | Poor                            | 0.88 (0.738, 1.045) | 0.94 (0.731, 1.211) | 0.71 (0.465, 1.089) |
|                                          | Excellent - ref                 | 1.00                | 1.00                | 1.00                |
| <b>Sex</b>                               | Female                          | 1.41 (1.330, 1.503) | 1.34 (1.227, 1.474) | 1.14 (0.976, 1.327) |
|                                          | Male - ref                      | 1.00                | 1.00                | 1.00                |
